# Supplementary material for: Cell- and Tissue-Specific Transcriptome Analyses of Medicago truncatula Root Nodules
Source: PLoS One. 2013 May 29;8(5):e64377. doi: 10.1371/journal.pone.0064377 (PMC3667139; doi:10.1371/journal.pone.0064377)
Supplement: Table S9 — Putative (receptor) protein kinase genes showing enriched expression specifically in the nodule meristem (sheet 1), distal infection zone (sheet 2), proximal infection zone (sheet 3), total infection zone (sheet 4), infected cells from the fixation zone (sheet 5) and uninfected cells (sheet 6). (XLS) [file pone.0064377.s010.xls]

## Sheet: Meristem
Table S9. Putative (receptor) protein kinase genes showing enriched expression specifically in the nodule meristem (sheet 1), distal infection zone (sheet 2), proximal infection zone (sheet 3), total infection zone (sheet 4), infected cells (sheet 5) and uninfected cells (sheet 6). In each sheet, Column A: Medicago GeneChip Id; Column B: gene name; Column C: Gene Annotation; Column D: Mean expres…
Medicago GeneChip ID	Gene	Annotation	A Mean	Meristem enrichment factor	p value	q value	Distal infection zone enrichment factor	p value	q value	Proximal infection zone enrichment factor	p value	q value	Infection zone enrichment factor	p value	q value	Infected cell enrichment factor	p value	q value	Uninfected cell enrichment factor	p value	q value	Root 0d log2	Nod4d log2	Nod10d log2	Nod14d log2	BiolFunction GO ID	GO term	MolecFunct GO ID	GO term	Gene function
Mtr.43625.1.S1_at		BRASSINOSTEROID INSENSITIVE 1-associated receptor kinase 1 Short=BRI1-associated receptor kinase 1; EC=2.7.11.1; AltName: Full=Somatic embryogenesis receptor-like kinase 3; Flags: Precursor;	7.1285	11.2448	6.81492e-05	0.00785468	0.935303	0.883196	0.902988	1.45486	0.415267	0.823816	1.22795	0.582428	0.738014	0.182565	0.00169377	0.0168977	0.357982	0.0363033	0.202145	9.745	9.47634	8.19525	8.64638	GO:0009556 GO:0010152	microsporogenesis	GO:0016301	kinase activity	KOG: Serine/threonine protein kinase
Mtr.41552.1.S1_at		BRASSINOSTEROID INSENSITIVE 1-associated receptor kinase 1 Short=BRI1-associated receptor kinase 1; EC=2.7.11.1; AltName: Full=Somatic embryogenesis receptor-like kinase 3; Flags: Precursor;	5.1117	4.30487	0.00568365	0.091876	0.771133	0.575571	0.866491	1.49163	0.392365	0.820769	1.09781	0.804717	0.788389	0.222973	0.00471757	0.0334337	0.905729	0.830343	0.66779	9.38089	9.42501	8.65714	8.73708	GO:0006468	protein amino acid phosphorylation	GO:0016301	kinase activity	KOG: Serine/threonine protein kinase
Mtr.41213.1.S1_at		casein kinase I (CKI1)	6.795	5.92063	0.000505485	0.0225854	1.27003	0.563854	0.864717	0.705725	0.402994	0.821147	0.929607	0.828302	0.792706	0.068336	7.35174e-06	0.000479837	2.75762	0.0240838	0.164018	10.0884	9.54226	8.95274	8.92926	GO:0016310	phosphorylation	GO:0004681	casein kinase I activity	KOG: Casein kinase (serine/threonine/tyrosine protein kinase)
Mtr.43543.1.S1_at		cell division control protein 2 kinase homolog A (CDC2A)	9.7631	2.35691	0.00147902	0.0423087	1.07962	0.734567	0.886514	1.07486	0.749301	0.875307	1.10429	0.591858	0.740695	0.449227	0.0025179	0.0222234	0.813891	0.367737	0.508383	10.1547	9.72639	9.47127	9.56301	GO:0009409 GO:0007126 GO:0008284 GO:0042023 GO:0009555 GO:0009793 GO:0000910	response to cold	GO:0004693 GO:0016301 GO:0005515 GO:0004672	cyclin-dependent protein kinase activity	KOG: Protein kinase PCTAIRE and related kinases
Mtr.50839.1.S1_at		cyclin-dependent kinase 2	3.4509	21.2365	0.00037695	0.0187161	0.879734	0.851702	0.898621	0.857741	0.822891	0.883878	0.828842	0.737619	0.775745	0.183838	0.0236152	0.0944883	0.33945	0.129328	0.350303	9.23242	10.0304	8.11061	8.77972	GO:0000087 GO:0007346	M phase of mitotic cell cycle	GO:0004693	cyclin-dependent protein kinase activity	KOG: Protein kinase PCTAIRE and related kinases
Mtr.38479.1.S1_at		Cysteine-rich receptor-like protein kinase 11 Short=Cysteine-rich RLK11; EC=2.7.11.-; AltName: Full=Receptor-like protein kinase 3; Flags: Precursor;	3.7916	18.2494	9.1574e-06	0.00247512	0.307208	0.0183156	0.523796	0.264136	0.00921798	0.442499	0.18743	0.000338637	0.0278409	0.581255	0.24323	0.352384	1.16178	0.741825	0.642988	8.23554	7.35491	7.09064	7.01458	GO:0006468	protein amino acid phosphorylation	GO:0016301	kinase activity	KOG: Serine/threonine protein kinase
Mtr.12832.1.S1_at		Cysteine-rich receptor-like protein kinase 11 Short=Cysteine-rich RLK11; EC=2.7.11.-; AltName: Full=Receptor-like protein kinase 3; Flags: Precursor;	7.0703	11.4976	0.000253047	0.0149417	1.8504	0.251134	0.795017	0.430846	0.123097	0.713847	0.859789	0.724794	0.773623	0.0218718	1.94089e-06	0.00023111	4.98794	0.00696468	0.0776702	10.626	10.4958	9.43463	9.68877	GO:0006468	protein amino acid phosphorylation	GO:0005524 GO:0005515 GO:0004672	ATP binding	KOG: Serine/threonine protein kinase
Mtr.4709.1.S1_at		Cysteine-rich receptor-like protein kinase 28 Short=Cysteine-rich RLK28; EC=2.7.11.-; Flags: Precursor;	6.9187	8.31121	5.19089e-05	0.00696607	2.13902	0.0645161	0.663379	0.870581	0.721486	0.872408	1.51362	0.202984	0.559313	0.0222294	4.31993e-08	2.4744e-05	2.90659	0.0133865	0.115886	5.80478	8.66178	7.79377	7.9431	GO:0006468	protein amino acid phosphorylation	GO:0016301	kinase activity
Mtr.41169.1.S1_at		Cysteine-rich receptor-like protein kinase 3 Short=Cysteine-rich RLK3; EC=2.7.11.-; Flags: Precursor;	6.4291	6.40175	0.00186077	0.0485833	1.05788	0.910916	0.905334	2.94906	0.0447341	0.615476	2.13508	0.0795914	0.420775	0.136816	0.00107131	0.0123493	0.365968	0.0598938	0.25644	10.0414	9.49125	7.59246	8.33851	GO:0006468 GO:0007169	protein amino acid phosphorylation	GO:0005524 GO:0016301 GO:0004674	ATP binding	KOG: Serine/threonine protein kinase
Mtr.40918.1.S1_at		Dual specificity protein kinase shkC EC=2.7.11.1; AltName: Full=SH2 domain-containing protein C; AltName: Full=SH2 domain-containing protein 3;	6.3304	4.39492	0.00153841	0.0433836	0.960496	0.917985	0.90574	0.563891	0.157079	0.742193	0.664447	0.212714	0.566929	0.533632	0.123252	0.245999	0.787256	0.543565	0.577912	9.28979	8.50263	7.92006	8.03672	GO:0006468	protein amino acid phosphorylation	GO:0016301 GO:0004712	kinase activity	KOG: Tyrosine kinase specific for activated (GTP-bound) p21cdc42Hs
Mtr.35690.1.S1_at		Hexokinase-1 EC=2.7.1.1; AltName: Full=SoHxK1;	9.399	7.35076	0.000153414	0.0117394	2.72805	0.0238331	0.547573	2.19518	0.0677926	0.662527	3.29773	0.0022882	0.0818088	0.016539	2.97514e-08	1.97678e-05	1.37352	0.439713	0.537904	11.2073	10.2514	10.474	10.0688	GO:0019320 GO:0012501 GO:0010255	hexose catabolic process	GO:0008865 GO:0004340 GO:0004396	fructokinase activity
Mtr.31625.1.S1_at		hypothetical protein predicted by Glimmer/Critica	4.9261	7.77962	0.000580614	0.0244078	3.7558	0.0136188	0.489485	1.04103	0.933601	0.893877	2.48187	0.032918	0.301227	0.0559762	1.9633e-05	0.000854839	0.587314	0.279632	0.464943	7.16892	7.97785	6.75889	6.86542	GO:0006468	protein amino acid phosphorylation	GO:0005524 GO:0004672	ATP binding
Mtr.4852.1.S1_at		hypothetical protein predicted by Glimmer/Critica	7.435	7.29925	0.000606127	0.0249877	2.30992	0.0898359	0.696602	1.9938	0.155884	0.740879	2.76813	0.0163323	0.219194	0.039427	3.87905e-06	0.000332135	0.754483	0.551225	0.580798	8.02459	8.66285	7.08852	7.6865	GO:0006468 GO:0007169	protein amino acid phosphorylation	GO:0005524 GO:0016301 GO:0004674	ATP binding
Mtr.7713.1.S1_at		hypothetical protein predicted by Glimmer/Critica	2.5078	5.02345	0.00211894	0.0526384	0.650346	0.340599	0.815797	0.596248	0.255184	0.78707	0.531758	0.0969279	0.450596	0.550263	0.191787	0.312343	0.932945	0.875995	0.678561	6.46434	6.48704	5.4363	5.96578	GO:0006468	protein amino acid phosphorylation	GO:0016301 GO:0004675	kinase activity
Mtr.18336.1.S1_s_at		hypothetical protein predicted by Glimmer/Critica	2.8403	4.05568	0.000103055	0.00978557	0.604917	0.0817204	0.683068	0.789399	0.394239	0.820769	0.610935	0.0405585	0.32783	0.79062	0.397265	0.445691	0.653094	0.134717	0.355632	5.75489	4.98641	4.46597	4.44626	GO:0006468	protein amino acid phosphorylation	GO:0016301	kinase activity
Mtr.31719.1.S1_at		hypothetical protein predicted by Glimmer/Critica	3.5021	3.56228	0.00310217	0.0651745	1.54275	0.249704	0.794797	0.544794	0.114025	0.711182	0.890605	0.700767	0.768534	0.546345	0.115594	0.23749	0.611332	0.194122	0.407916	7.34784	7.87344	5.76022	6.44626	GO:0006468	protein amino acid phosphorylation	GO:0004708	MAP kinase kinase activity
Mtr.38502.1.S1_at		hypothetical protein predicted by Glimmer/Critica	2.737	3.40315	0.000139065	0.0110277	0.705896	0.17218	0.761941	0.965948	0.888567	0.889617	0.774694	0.217643	0.5709	0.637061	0.083087	0.197407	0.676462	0.128398	0.349327	5.33628	7.40939	5.65821	6.32012	GO:0006952	defense response	GO:0005524 GO:0000166 GO:0005515 GO:0004888 GO:0017111	ATP binding
Mtr.27090.1.S1_at		hypothetical protein predicted by Glimmer/Critica	2.76	2.83501	0.00539908	0.0895204	0.850545	0.622106	0.872744	1.13424	0.700874	0.869038	0.976342	0.92858	0.811507	0.420588	0.0165268	0.0753875	0.869332	0.669536	0.620947	4.30743	5.3147	4.96347	5.05311	GO:0006468	protein amino acid phosphorylation	GO:0016301	kinase activity
Mtr.31613.1.S1_at		leucine-rich repeat family protein	5.2869	33.8013	0.00043371	0.0204599	0.692899	0.648295	0.876382	1.14742	0.863838	0.888228	0.858214	0.815427	0.79081	0.0913128	0.00819873	0.0477683	0.407514	0.27245	0.460726	9.11998	8.39103	5.90207	6.6014	GO:0006468 GO:0007169	protein amino acid phosphorylation	GO:0005524 GO:0016301 GO:0004672	ATP binding
Mtr.28323.1.S1_at		leucine-rich repeat family protein / protein kinase family protein	3.1239	7.40091	0.000344203	0.0178042	0.40844	0.0580587	0.658319	0.449666	0.0870181	0.689673	0.323106	0.00626913	0.138957	0.24943	0.00612604	0.0396256	2.9495	0.0254921	0.169126	7.33807	5.98185	4.78136	4.92125	GO:0006468	protein amino acid phosphorylation	GO:0005515 GO:0004672	protein binding
Mtr.34318.1.S1_at		leucine-rich repeat transmembrane protein kinase, putative	6.5214	20.395	8.85877e-08	0.000147293	5.15534	0.000113894	0.0821105	5.1717	0.000111717	0.0724486	8.92471	4.06902e-07	0.000437298	0.0106446	3.10261e-10	2.06148e-06	0.172765	5.67062e-05	0.00322698	7.19673	9.34007	8.12464	8.36676	GO:0006468 GO:0007169	protein amino acid phosphorylation	GO:0005524 GO:0004674	ATP binding
Mtr.22990.1.S1_at		leucine-rich repeat transmembrane protein kinase, putative	6.0739	8.77708	2.82762e-05	0.00465775	0.298473	0.00506573	0.37109	2.70081	0.0166986	0.511283	0.866163	0.640952	0.75322	0.0780521	4.58479e-06	0.000369043	1.81078	0.128857	0.349791	9.84172	10.888	9.21917	9.56624	GO:0010075 GO:0048229 GO:0048437 GO:0048653 GO:0010480	regulation of meristem size	GO:0005524 GO:0016301 GO:0004674	ATP binding	KOG: FOG: Leucine rich repeat
Mtr.12120.1.S1_at		leucine-rich repeat transmembrane protein kinase, putative	3.6351	7.48991	0.00028388	0.0157222	0.828562	0.668427	0.878978	0.316669	0.0172491	0.516256	0.409846	0.0225351	0.254588	0.247488	0.00534995	0.0362587	2.05607	0.114494	0.335808	8.30104	7.06393	5.87774	6.33271	GO:0006468 GO:0007169	protein amino acid phosphorylation	GO:0005524 GO:0004674	ATP binding
Mtr.5346.1.S1_at		leucine-rich repeat transmembrane protein kinase, putative	3.8035	4.1671	0.00108983	0.0355007	0.789151	0.515483	0.854096	0.469924	0.0504413	0.629303	0.516169	0.0375444	0.316558	0.348742	0.00953724	0.0526404	1.85556	0.102287	0.321606	9.57818	10.003	9.3147	9.38974	GO:0010075 GO:0048229 GO:0048437 GO:0048653 GO:0010480	regulation of meristem size	GO:0005524 GO:0016301 GO:0004674	ATP binding
Mtr.12425.1.S1_at		mitogen-activated protein kinase, putative / MAPK, putative (MPK10)	8.7087	3.27716	0.000160334	0.01192	1.52318	0.0984262	0.707661	0.928804	0.76159	0.87719	1.26023	0.254239	0.594741	0.196366	5.33383e-06	0.000403818	1.0984	0.700106	0.629878	10.3838	10.0305	10.1807	10.1508	GO:0009409 GO:0006972 GO:0016310 GO:0009620 GO:0009651 GO:0009861 GO:0009868 GO:0009862 GO:0042539	response to cold	GO:0004707	MAP kinase activity	KOG: Mitogen-activated protein kinase
Mtr.11722.1.S1_at		pfkB-type carbohydrate kinase family protein	4.0562	4.22981	0.00293412	0.0633878	1.94214	0.124347	0.731977	1.63895	0.244536	0.784159	2.16386	0.0348236	0.307602	0.208267	0.00154388	0.0158384	0.356627	0.0230316	0.160181	7.10329	7.38629	6.39917	6.7211	GO:0005986 GO:0019575 GO:0019654	sucrose biosynthetic process	GO:0016301	kinase activity	KOG: Ribokinase
Mtr.44181.1.S1_at		phosphomevalonate kinase	8.1372	4.37156	0.000709435	0.0273598	2.11027	0.0490758	0.636174	1.12608	0.738565	0.874731	1.78076	0.0609222	0.383153	0.445757	0.0350399	0.119522	0.215952	0.00050743	0.0135787	10.5855	10.0629	8.65499	9.17717	GO:0016310	phosphorylation	GO:0005524 GO:0016301	ATP binding	KOG: Phosphomevalonate kinase
Mtr.44878.1.S1_at		Probable inactive receptor kinase At4g23740 Flags: Precursor;	4.8821	7.27414	0.00335184	0.0685015	2.3352	0.15852	0.753313	1.33792	0.618103	0.858789	2.13716	0.124384	0.4846	0.0432178	5.7816e-05	0.00174613	1.01812	0.975359	0.700717	10.0314	9.21237	7.8716	8.28401	GO:0006468 GO:0007169	protein amino acid phosphorylation	GO:0005524 GO:0016301 GO:0004674	ATP binding	KOG: Serine/threonine protein kinase
Mtr.42133.1.S1_at		Probable inactive receptor kinase At4g23740 Flags: Precursor;	4.2111	4.71009	0.00552809	0.090635	0.82797	0.699696	0.882345	0.845147	0.730884	0.874061	0.788191	0.552779	0.728754	0.412091	0.0843555	0.199114	0.73626	0.533229	0.573986	6.63952	6.73064	5.15785	5.40599	GO:0006468 GO:0007169	protein amino acid phosphorylation	GO:0005524 GO:0016301 GO:0004674	ATP binding	KOG: Serine/threonine protein kinase
Mtr.28821.1.S1_at		Probable inactive receptor kinase At5g58300 Flags: Precursor;	3.8435	20.6298	1.51279e-07	0.000214084	0.68785	0.279455	0.80087	0.424232	0.0211085	0.53984	0.439945	0.00857506	0.16146	0.351865	0.00674865	0.0421664	0.472097	0.039632	0.211525	8.94075	8.48864	6.03342	7.02348	GO:0006468 GO:0007169	protein amino acid phosphorylation	GO:0005524 GO:0016301 GO:0004674	ATP binding	KOG: Serine/threonine protein kinase
Mtr.142.1.S1_s_at	LYK3	Probable serine/threonine-protein kinase RLCKVII EC=2.7.11.1;	3.8845	23.4114	9.57326e-06	0.00253398	9.5216	0.000313975	0.132177	0.343958	0.0443716	0.614976	2.20535	0.0650028	0.392845	0.111338	0.000399456	0.00624205	0.117142	0.000493142	0.0133153	9.50799	7.848	6.55919	6.97957	GO:0032491	detection of molecule of fungal origin	GO:0016301 GO:0005057 GO:0019199	kinase activity	KOG: Serine/threonine protein kinase
Mtr.16154.1.S1_at		Probable serine/threonine-protein kinase RLCKVII EC=2.7.11.1;	2.5002	2.11477	0.00568954	0.0919057	0.856045	0.514857	0.853983	0.755557	0.247486	0.78463	0.747899	0.147374	0.509648	0.799134	0.351073	0.421095	0.914857	0.707912	0.632431	3.24793	3.26303	3.21723	3.45943	GO:0006499	N-terminal protein myristoylation	GO:0016301	kinase activity	KOG: Serine/threonine protein kinase
Mtr.27773.1.S1_at		Protein BRASSINOSTEROID INSENSITIVE 1 Short=AtBRI1; EC=2.7.11.1; AltName: Full=Brassinosteroid LRR receptor kinase; Flags: Precursor;	8.9143	9.39219	4.21396e-05	0.00613834	2.90613	0.0164013	0.515039	2.12776	0.0753972	0.67095	3.36892	0.00184119	0.0726274	0.0261916	1.25295e-07	4.33594e-05	0.657407	0.305731	0.480476	9.18339	9.18388	8.41701	8.67384	GO:0009742	brassinosteroid mediated signaling	GO:0016301	kinase activity
Mtr.4053.1.S1_at		Protein kinase APK1A, chloroplastic EC=2.7.11.1; Flags: Precursor;	1.9651	2.611	0.000917182	0.0319728	0.895943	0.645668	0.876077	1.04127	0.865198	0.888331	0.954766	0.811998	0.789675	0.623105	0.0613441	0.165755	0.65885	0.0947565	0.311256	7.82082	7.98812	8.04658	7.79896	GO:0006468	protein amino acid phosphorylation	GO:0016301	kinase activity	KOG: Serine/threonine protein kinase
Mtr.2293.1.S1_at		protein kinase family protein	2.5525	3.83215	0.00101476	0.0340008	0.857796	0.650501	0.876633	0.663446	0.235049	0.779865	0.686741	0.185431	0.547173	0.480047	0.0426605	0.134184	0.955177	0.891917	0.682217	7.96924	6.53294	4.43296	4.91648	GO:0006468	protein amino acid phosphorylation	GO:0016301	kinase activity
Mtr.49033.1.S1_s_at		protein kinase, putative	3.2335	14.3826	4.60723e-06	0.0016526	1.73148	0.175863	0.76423	0.684418	0.342172	0.813384	1.11985	0.724927	0.773623	0.244204	0.0023278	0.021066	0.240254	0.00213339	0.0351319	8.95594	9.89451	7.50383	8.34252	GO:0016572	histone phosphorylation	GO:0016301 GO:0004674 GO:0035175	kinase activity	KOG: Serine/threonine protein kinase
Mtr.27778.1.S1_at		protein kinase, putative	1.8562	2.01211	0.00295499	0.0636444	0.869856	0.492117	0.849184	0.699249	0.0906442	0.692302	0.717882	0.0579977	0.376001	0.946541	0.785232	0.596636	0.863238	0.469104	0.550847	7.40514	8.80252	8.04166	7.98128	GO:0006468	protein amino acid phosphorylation	GO:0016301	kinase activity	KOG: Serine/threonine protein kinase
Mtr.10005.1.S1_at		Putative cysteine-rich receptor-like protein kinase 35 Short=Cysteine-rich RLK35; EC=2.7.11.-; Flags: Precursor;	3.1318	9.00366	0.00433964	0.0791412	1.02413	0.971533	0.910234	0.489838	0.294339	0.800497	0.631351	0.404663	0.675145	0.3023	0.0883341	0.20463	0.73238	0.642267	0.612144	7.24888	8.23314	7.17093	7.28725	GO:0006468 GO:0007169	protein amino acid phosphorylation	GO:0005524 GO:0016301 GO:0004674	ATP binding	KOG: Serine/threonine protein kinase
Mtr.10055.1.S1_at		Putative cysteine-rich receptor-like protein kinase 39 Short=Cysteine-rich RLK39; EC=2.7.11.-; Flags: Precursor;	7.1857	13.7632	0.00139246	0.0409414	0.402504	0.196223	0.773496	1.01452	0.9832	0.89852	0.55041	0.294333	0.61961	0.0350807	0.000156952	0.00332538	5.07203	0.0288994	0.18029	8.00731	9.97241	9.45615	9.76205	GO:0006468	protein amino acid phosphorylation	GO:0016301	kinase activity	KOG: Serine/threonine protein kinase
Mtr.7559.1.S1_at		Putative kinase-like protein TMKL1 Flags: Precursor;	4.497	13.2159	0.000244588	0.0148909	0.365423	0.0833379	0.686329	0.372955	0.0891753	0.69066	0.264831	0.00891601	0.164771	0.129846	0.00184688	0.0179081	4.27585	0.0171233	0.134965	9.1249	8.12567	7.37156	7.24888	GO:0006468 GO:0007169	protein amino acid phosphorylation	GO:0005524 GO:0016301 GO:0004674	ATP binding
Mtr.28671.1.S1_at		Putative serine/threonine-protein kinase At1g01540 EC=2.7.11.1;	4.5733	7.21775	0.000879773	0.0311784	0.817837	0.68114	0.880364	0.964209	0.940469	0.894848	0.853543	0.691816	0.766976	0.263732	0.013922	0.0678665	0.666189	0.410565	0.526381	7.84109	8.39874	7.25833	7.5306	GO:0006468	protein amino acid phosphorylation	GO:0005515 GO:0004672	protein binding	KOG: Serine/threonine protein kinase
Mtr.11491.1.S1_at		Putative serine/threonine-protein kinase At1g01540 EC=2.7.11.1;	4.3251	6.91485	0.0002142	0.0138804	0.676671	0.345694	0.817521	0.334938	0.0154457	0.500206	0.371731	0.00847426	0.160543	0.407728	0.040732	0.130578	1.56496	0.281763	0.466431	8.87375	8.1236	7.55995	7.46107	GO:0006468	protein amino acid phosphorylation	GO:0016301	kinase activity	KOG: Serine/threonine protein kinase
Mtr.11180.1.S1_at		Putative serine/threonine-protein kinase At1g54610 EC=2.7.11.1;	9.5523	3.80745	0.00309676	0.0651593	1.71429	0.17745	0.764557	1.06837	0.864567	0.888269	1.49694	0.214194	0.568094	0.111243	3.48553e-05	0.00124028	1.28911	0.515262	0.568006	8.43296	8.48704	8.41954	8.52082	GO:0006499 GO:0006468	N-terminal protein myristoylation	GO:0004672	protein kinase activity	KOG: Cdc2-related protein kinase
Mtr.4884.1.S1_at		Putative serine/threonine-protein kinase At4g35230 EC=2.7.11.1;	7.5427	8.31965	1.28219e-05	0.00292965	2.60208	0.0120524	0.476102	1.24981	0.516639	0.842542	2.19505	0.0115802	0.186025	0.0233435	9.1022e-09	1.00797e-05	1.5833	0.191058	0.405426	9.17966	9.14185	8.53916	8.61985	GO:0006499 GO:0006468	N-terminal protein myristoylation	GO:0016301	kinase activity
Mtr.4884.1.S1_s_at		Putative serine/threonine-protein kinase At4g35230 EC=2.7.11.1;	6.3532	5.85962	0.000115109	0.0101866	1.63296	0.174589	0.763804	1.30656	0.449392	0.830959	1.65731	0.0922056	0.44336	0.0765654	1.78395e-06	0.000221969	1.0447	0.900619	0.684572	8.68615	8.50859	8.09645	8.27938	GO:0006499 GO:0006468	N-terminal protein myristoylation	GO:0016301	kinase activity
Mtr.11267.1.S1_at		Putative wall-associated receptor kinase-like 20 EC=2.7.11.-; Flags: Precursor;	3.3488	6.4969	0.000587897	0.0245526	0.475878	0.107059	0.717038	0.764507	0.544951	0.848106	0.509626	0.0759657	0.415066	0.396177	0.049345	0.146146	1.06789	0.881603	0.679745	10.4488	9.63118	8.83605	8.93929	GO:0006468	protein amino acid phosphorylation	GO:0016301	kinase activity	KOG: Serine/threonine protein kinase
Mtr.8216.1.S1_at		pyruvate dehydrogenase kinase	7.9656	3.35187	0.00099333	0.033472	1.34328	0.33754	0.815406	0.903379	0.737816	0.874731	1.13769	0.603688	0.744171	0.399918	0.00756217	0.045389	0.614759	0.12304	0.344382	7.82782	7.43546	7.94953	7.35138	GO:0016310 GO:0018106	phosphorylation	GO:0005524 GO:0004740	ATP binding	KOG: Dehydrogenase kinase
Mtr.38606.1.S1_at		pyruvate kinase, putative	7.9645	14.4424	1.44265e-07	0.000212961	3.64248	0.000487468	0.160786	2.10173	0.0227403	0.548361	3.88433	4.15867e-05	0.00805743	0.0185084	5.92864e-10	2.8137e-06	0.488671	0.0272379	0.17487	9.26327	9.49205	7.84172	8.56834	GO:0006633 GO:0006096 GO:0048316	fatty acid biosynthetic process	GO:0004743	pyruvate kinase activity	KOG: Pyruvate kinase
Mtr.32691.1.S1_at		Receptor protein kinase-like protein At4g34220 Flags: Precursor;	2.725	2.65392	0.00348793	0.0701988	0.814191	0.478527	0.846171	0.851291	0.577626	0.854051	0.783195	0.306598	0.626533	0.787218	0.41085	0.451957	0.690578	0.210056	0.420037	9.04876	10.5401	7.76155	8.41024	GO:0006468 GO:0007169	protein amino acid phosphorylation	GO:0005524 GO:0016301 GO:0004674	ATP binding
Mtr.43617.1.S1_at		Receptor-like protein kinase 2 EC=2.7.11.1; Flags: Precursor;	6.037	5.27922	0.00355984	0.0707555	2.06055	0.155361	0.751002	2.20137	0.123246	0.713847	2.74021	0.0218502	0.251597	0.13053	0.000728495	0.00947604	0.319921	0.0321995	0.189945	9.37374	7.96232	7.17293	7.32193	GO:0007165	signal transduction	GO:0005515	protein binding	KOG: FOG: Leucine rich repeat
Mtr.31649.1.S1_at		Serine/threonine-protein kinase BRI1-like 1 EC=2.7.11.1; AltName: Full=BRASSINOSTEROID INSENSITIVE 1-like protein 1; Flags: Precursor;	7.438	4.75057	0.00263927	0.0596484	0.7968	0.60884	0.871216	0.509932	0.141815	0.730131	0.548581	0.111036	0.467037	0.543999	0.181387	0.302963	0.952346	0.912043	0.687728	7.86913	8.69836	8.92095	8.92184	GO:0006468	protein amino acid phosphorylation	GO:0016301	kinase activity
Mtr.31914.1.S1_at		Serine/threonine-protein kinase HT1 EC=2.7.11.1; AltName: Full=High leaf temperature protein 1;	3.0687	4.521	0.00130231	0.0393413	0.989599	0.978646	0.910878	0.474285	0.0708999	0.666882	0.603947	0.128469	0.489102	0.442053	0.0503422	0.147792	1.06609	0.869927	0.677447	7.6575	7.40854	6.56682	6.72928	GO:0006468	protein amino acid phosphorylation	GO:0016301 GO:0004712	kinase activity	KOG: Tyrosine kinase specific for activated (GTP-bound) p21cdc42Hs
Mtr.38903.1.S1_at		Serine/threonine-protein kinase PBS1 EC=2.7.11.1; AltName: Full=AvrPphB susceptible protein 1;	5.4289	13.6512	0.00292053	0.0633878	3.6862	0.0976111	0.706257	0.591862	0.488781	0.837328	1.68216	0.402281	0.674236	0.122372	0.0122004	0.0618989	0.274379	0.100307	0.318951	8.98954	8.90839	9.41891	9.1393	GO:0006468	protein amino acid phosphorylation	GO:0016301	kinase activity	KOG: Serine/threonine protein kinase
Mtr.12329.1.S1_at		shaggy-related protein kinase gamma / ASK-gamma (ASK3)	8.1313	6.14629	0.000739391	0.0278937	1.28522	0.569922	0.865342	1.67704	0.249733	0.784808	1.66858	0.166971	0.529607	0.053087	5.45908e-06	0.000408836	1.42193	0.427802	0.533514	11.4051	11.1142	10.9572	10.7733	GO:0009933	meristem organization	GO:0004674	protein serine/threonine kinase activity	KOG: Glycogen synthase kinase-3
Mtr.13054.1.S1_at		Wall-associated receptor kinase 3 EC=2.7.11.-; Flags: Precursor;	2.1471	2.64206	0.00209916	0.0524524	0.688389	0.175668	0.76423	0.903077	0.703586	0.869884	0.728404	0.160238	0.522621	0.724805	0.239484	0.349349	0.839996	0.517161	0.568559	8.96723	6.74685	4.87774	5.52356	GO:0006468	protein amino acid phosphorylation	GO:0016301 GO:0004674	kinase activity
Mtr.44802.1.S1_at		Wall-associated receptor kinase-like 14 EC=2.7.11.-; Flags: Precursor;	6.1205	10.2823	0.000304381	0.0165005	0.685187	0.462953	0.843792	0.760743	0.593901	0.855947	0.647686	0.305876	0.626305	0.18597	0.00428538	0.0314	1.00327	0.994892	0.704997	8.7252	9.3626	8.04166	8.53877	GO:0006468	protein amino acid phosphorylation	GO:0016301	kinase activity	KOG: Serine/threonine protein kinase
Mtr.9717.1.S1_at		Wall-associated receptor kinase-like 14 EC=2.7.11.-; Flags: Precursor;	5.2387	4.4849	0.00351221	0.0703508	0.31063	0.0167529	0.517007	0.484205	0.116184	0.71172	0.282823	0.00282156	0.0928994	0.673473	0.378102	0.436315	2.20118	0.0897034	0.304531	7.84612	8.18735	8.04111	8.05365	GO:0006468	protein amino acid phosphorylation	GO:0016301	kinase activity	KOG: Serine/threonine protein kinase

## Sheet: Distal infection zone
Supplementary table S9. Putative (receptor) protein kinase genes showing enriched expression specifically in the distal infection zone. Column A: Medicago GeneChip Id; Column B: gene name; Column C: Gene Annotation; Column D: Mean expression value (log2) in all LCM samples; Column E-V: fold enrichment for each LCM cell/tissue including p and q (corrected for multiple testing) statistics; Column E…
Medicago GeneChip ID	Gene	Annotation	A Mean	Meristem enrichment factor	p value	q value	Distal infection zone enrichment factor	p value	q value	Proximal infection zone enrichment factor	p value	q value	Infection zone enrichment factor	p value	q value	Infected cell enrichment factor	p value	q value	Uninfected cell enrichment factor	p value	q value	Root 0d log2	Nod4d log2	Nod10d log2	Nod14d log2	BiolFunction GO ID	GO term	MolecFunct GO ID	GO term	Gene function
Mtr.13506.1.S1_at		Probable inactive LRR receptor kinase At1g48480 Flags: Precursor;	4.3873	0.619268	0.423469	0.592636	17.2779	0.000185395	0.105149	2.61877	0.118868	0.712294	12.6977	7.69271e-05	0.0114475	0.218157	0.0193513	0.0833881	0.163592	0.00707693	0.0784107	7.88387	9.15507	6.63807	7.30469	GO:0006468 GO:0007169	protein amino acid phosphorylation	GO:0005524 GO:0016301 GO:0004674	ATP binding	KOG: FOG: Leucine rich repeat

## Sheet: Proximal infection zone
Supplementary table S9. Putative (receptor) kinase genes showing enriched expression specifically in the proximal infection zone. Column A: Medicago GeneChip Id; Column B: gene name; Column C: Gene Annotation; Column D: Mean expression value (log2) in all LCM samples; Column E-V: fold enrichment for each LCM cell/tissue including p and q (corrected for multiple testing) statistics; Column E-G = M…
Medicago GeneChip ID	Gene	Annotation	A Mean	Meristem enrichment factor	p value	q value	Distal infection zone enrichment factor	p value	q value	Proximal infection zone enrichment factor	p value	q value	Infection zone enrichment factor	p value	q value	Infected cell enrichment factor	p value	q value	Uninfected cell enrichment factor	p value	q value	Root 0d log2	Nod4d log2	Nod10d log2	Nod14d log2	BiolFunction GO ID	GO term	MolecFunct GO ID	GO term	Gene function
Mtr.15888.1.S1_at		Serine/threonine-protein kinase PBS1 EC=2.7.11.1; AltName: Full=AvrPphB susceptible protein 1;	4.2379	0.120199	0.000141514	0.0111988	16.4204	7.11458e-06	0.0137866	45.6929	1.51387e-07	0.00115804	82.5698	1.35653e-09	1.13713e-05	0.105042	7.61131e-05	0.00208108	0.105561	7.78393e-05	0.00398078	7.59171	9.73386	7.08746	7.57289	GO:0006468	protein amino acid phosphorylation	GO:0016301	kinase activity	KOG: Serine/threonine protein kinase
Mtr.15644.1.S1_s_at	MtIRE	microtubule associated serine/threonine kinase 2	5.1204	0.125188	0.0020538	0.0516553	3.34288	0.0477578	0.633979	7.2225	0.00297848	0.309665	8.35357	0.000307505	0.0266844	2.27486	0.163009	0.286445	0.145437	0.00357163	0.0501823	3.57289	10.9463	9.53799	10.4585	GO:0009826	unidimensional cell growth	GO:0004674	protein serine/threonine kinase activity	KOG: Microtubule-associated serine/threonine kinase and related proteins

## Sheet: Infection zone
Supplementary table S9. Putative (receptor) protein kinase genes showing enriched expression in the infection zone of the nodule. Column A: Medicago GeneChip Id; Column B: gene name; Column C: Gene Annotation; Column D: Mean expression value (log2) in all LCM samples; Column E-V: fold enrichment for each LCM cell/tissue including p and q (corrected for multiple testing) statistics; Column E-G = M…
Medicago GeneChip ID	Gene	Annotation	A Mean	Meristem enrichment factor	p value	q value	Distal infection zone enrichment factor	p value	q value	Proximal infection zone enrichment factor	p value	q value	Infection zone enrichment factor	p value	q value	Infected cell enrichment factor	p value	q value	Uninfected cell enrichment factor	p value	q value	Root 0d log2	Nod4d log2	Nod10d log2	Nod14d log2	BiolFunction GO ID	GO term	MolecFunct GO ID	GO term	Gene function
Mtr.15888.1.S1_at		Serine/threonine-protein kinase PBS1 EC=2.7.11.1; AltName: Full=AvrPphB susceptible protein 1;	4.2379	0.120199	0.000141514	0.0111988	16.4204	7.11458e-06	0.0137866	45.6929	1.51387e-07	0.00115804	82.5698	1.35653e-09	1.13713e-05	0.105042	7.61131e-05	0.00208108	0.105561	7.78393e-05	0.00398078	7.59171	9.73386	7.08746	7.57289	GO:0006468	protein amino acid phosphorylation	GO:0016301	kinase activity	KOG: Serine/threonine protein kinase
Mtr.41108.1.S1_at		Probable inactive receptor kinase RLK902 AltName: Full=Receptor-like kinase 902; Flags: Precursor;	6.416	1.30696	0.602134	0.657259	10.4824	0.000285665	0.128985	5.97372	0.00280673	0.304576	15.769	6.23112e-06	0.00230376	0.0460128	1.78972e-05	0.000800217	0.265554	0.0184499	0.141229	9.5216	10.5376	8.11998	8.6837	GO:0006468 GO:0007169	protein amino acid phosphorylation	GO:0005524 GO:0016301 GO:0004674	ATP binding	KOG: Serine/threonine protein kinase
Mtr.38617.1.S1_at		Microtubule-associated serine/threonine-protein kinase 4 EC=2.7.11.1;	9.8661	0.0459485	2.35105e-07	0.000264648	5.39446	0.000222999	0.115234	9.4555	1.0985e-05	0.0201672	13.7538	1.37333e-07	0.000179878	5.70572	0.000162658	0.00340503	0.07478	2.03254e-06	0.000361885	3.63227	11.1199	9.54361	10.643	GO:0009826	unidimensional cell growth	GO:0004674	protein serine/threonine kinase activity	KOG: Microtubule-associated serine/threonine kinase and related proteins
Mtr.41420.1.S1_s_at		Cyclin-D1-1 AltName: Full=G1/S-specific cyclin-D1-1; Short=CycD1;1; AltName: Full=Cyclin-delta-1; Short=Cyclin-d1;	6.2067	0.0801423	0.000292222	0.0161145	7.45123	0.00203779	0.266964	6.41836	0.00360456	0.331479	13.1755	3.05061e-05	0.00697965	0.310859	0.0472271	0.142413	0.839311	0.75069	0.645781	6.74953	7.11478	6.95536	6.70598	GO:0000080 GO:0051726	G1 phase of mitotic cell cycle	GO:0016538	cyclin-dependent protein kinase regulator activity	KOG: G1/S-specific cyclin D
Mtr.4752.1.S1_at		Receptor protein kinase CLAVATA1 EC=2.7.11.1; Flags: Precursor;	7.9306	0.0726848	0.000203399	0.0135684	4.45295	0.0144077	0.496464	10.7085	0.000514435	0.142236	13.1498	3.06408e-05	0.00697965	0.0548952	7.40215e-05	0.00205064	5.25586	0.00770652	0.0824656	7.99266	10.785	10.8022	10.2869	GO:0010075 GO:0048437	regulation of meristem size	GO:0005524 GO:0004674	ATP binding
Mtr.13506.1.S1_at		Probable inactive receptor kinase At1g48480 Flags: Precursor;	4.3873	0.619268	0.423469	0.592636	17.2779	0.000185395	0.105149	2.61877	0.118868	0.712294	12.6977	7.69271e-05	0.0114475	0.218157	0.0193513	0.0833881	0.163592	0.00707693	0.0784107	7.88387	9.15507	6.63807	7.30469	GO:0006468 GO:0007169	protein amino acid phosphorylation	GO:0005524 GO:0016301 GO:0004674	ATP binding	KOG: FOG: Leucine rich repeat
Mtr.39671.1.S1_at		SERINE/THREONINE-PROTEIN KINASE CTR1	6.4595	1.87484	0.36289	0.567715	4.09379	0.052392	0.642638	7.34086	0.009289	0.444567	9.66603	0.000829189	0.0467124	0.0580012	0.000672363	0.00900686	0.306004	0.0971733	0.314484	9.54303	8.93575	8.81986	9.01262	GO:0006468	protein amino acid phosphorylation	GO:0016301 GO:0004712	kinase activity	KOG: Tyrosine kinase specific for activated (GTP-bound) p21cdc42Hs
Mtr.24207.1.S1_at		Putative serine/threonine-protein kinase At1g01540 EC=2.7.11.1;	8.8983	0.555783	0.128472	0.4057	5.61329	0.000259816	0.125151	5.29504	0.000357688	0.116914	9.59529	1.47465e-06	0.000981069	0.169911	0.000200872	0.0039301	0.356275	0.0126396	0.11216	10.1444	11.5117	10.3217	10.3184	GO:0006468	protein amino acid phosphorylation	GO:0016301	kinase activity	KOG: Serine/threonine protein kinase
Mtr.15644.1.S1_s_at		microtubule associated serine/threonine kinase 2	5.1204	0.125188	0.0020538	0.0516553	3.34288	0.0477578	0.633979	7.2225	0.00297848	0.309665	8.35357	0.000307505	0.0266844	2.27486	0.163009	0.286445	0.145437	0.00357163	0.0501823	3.57289	10.9463	9.53799	10.4585	GO:0009826	unidimensional cell growth	GO:0004674	protein serine/threonine kinase activity	KOG: Microtubule-associated serine/threonine kinase and related proteins
Mtr.20266.1.S1_at		Putative serine/threonine-protein kinase At1g54610 EC=2.7.11.1;	6.6236	1.33096	0.619996	0.662118	3.85983	0.0300742	0.567476	2.99405	0.070878	0.666882	5.11153	0.00290807	0.0941279	0.996669	0.995364	0.650795	0.0652314	0.000207851	0.00773852	4.50462	8.4822	7.31016	7.77083	GO:0006499 GO:0006468	N-terminal protein myristoylation	GO:0016301	kinase activity	KOG: Cdc2-related protein kinase
Mtr.16214.1.S1_at		Putative serine/threonine-protein kinase At1g01540 EC=2.7.11.1;	7.4721	1.2036	0.731306	0.692842	4.06677	0.0180533	0.523796	2.68128	0.0820141	0.68053	4.91732	0.00215713	0.0792166	0.244879	0.0177718	0.079003	0.311154	0.0432909	0.221084	6.72792	10.1525	8.7364	9.17891	GO:0006468	protein amino acid phosphorylation	GO:0016301	kinase activity	KOG: Serine/threonine protein kinase
Mtr.44173.1.S1_at		leucine-rich repeat protein kinase, putative (TMK1)	8.6616	1.09497	0.751518	0.697956	1.96141	0.0299051	0.566058	3.28352	0.000706062	0.163668	3.46156	6.8299e-05	0.0108819	0.294568	0.000554847	0.00788918	0.481397	0.0199514	0.147906	8.42668	8.78921	6.91767	7.3147	GO:0006468	protein amino acid phosphorylation	GO:0005515 GO:0004672	protein binding
Mtr.5895.1.S1_at		Cysteine-rich receptor-like protein kinase 10 Short=Cysteine-rich RLK10; EC=2.7.11.-; AltName: Full=Receptor-like protein kinase 4; Flags: Precursor;	2.2677	0.510989	0.00616647	0.0962085	2.40795	0.00081565	0.202585	2.40708	0.000818489	0.176068	3.2267	5.57028e-06	0.00210332	0.786634	0.27407	0.373159	0.429218	0.00112287	0.0229067	3.44626	4.51728	3.9542	4.01792	GO:0006468	protein amino acid phosphorylation	GO:0016301	kinase activity
Mtr.41815.1.S1_at		FGGY carbohydrate kinase domain-containing protein EC=2.7.1.-;	9.2749	0.920018	0.826197	0.716358	2.42402	0.0311723	0.571114	2.12486	0.0612941	0.651362	2.98248	0.00262719	0.089017	0.176568	0.000300896	0.00514531	1.19516	0.639607	0.611195	9.87774	9.54632	9.28979	9.35403	GO:0005975	carbohydrate metabolic process	GO:0019200	carbohydrate kinase activity	KOG: Ribulose kinase and related carbohydrate kinases
Mtr.41420.1.S1_at		Cyclin-D1-1 AltName: Full=G1/S-specific cyclin-D1-1; Short=CycD1;1; AltName: Full=Cyclin-delta-1; Short=Cyclin-d1;	4.9995	0.406795	0.0216405	0.189716	2.14491	0.0461909	0.628753	2.3557	0.0275217	0.56696	2.94455	0.00183304	0.0724947	0.637671	0.219912	0.334809	0.762954	0.4535	0.544232	5.46923	5.89966	5.55766	5.71973	GO:0000080 GO:0051726	G1 phase of mitotic cell cycle	GO:0016538	cyclin-dependent protein kinase regulator activity	KOG: G1/S-specific cyclin D
Mtr.26901.1.S1_at		hypothetical protein predicted by Glimmer/Critica	9.4746	1.10048	0.75569	0.69913	1.79311	0.0720888	0.671482	2.25024	0.016796	0.512252	2.53449	0.00180222	0.0716671	0.19268	6.27468e-05	0.0018525	1.16881	0.613167	0.602507	9.68492	9.32057	8.94134	9.00927	GO:0006468	protein amino acid phosphorylation	GO:0005524 GO:0004672	ATP binding
Mtr.39099.1.S1_at		Systemin receptor SR160 EC=2.7.11.1; AltName: Full=Brassinosteroid LRR receptor kinase; Flags: Precursor;	2.681	0.651809	0.193364	0.466169	2.48554	0.0109465	0.469413	1.54429	0.186997	0.761028	2.4515	0.00319916	0.0986775	0.576405	0.0998997	0.219355	0.693431	0.26234	0.45421	7.06178	6.00899	6.19574	5.88753	GO:0006468 GO:0007169	protein amino acid phosphorylation	GO:0005524 GO:0016301 GO:0004674	ATP binding	KOG: Serine/threonine protein kinase

## Sheet: Infected cells
Supplementary table S9. Putative (receptor) protein kinase genes showing enriched expression specifically in the infected cells of the fixation. Column A: Medicago GeneChip Id; Column B: gene name; Column C: Gene Annotation; Column D: Mean expression value (log2) in all LCM samples; Column E-V: fold enrichment for each LCM cell/tissue including p and q (corrected for multiple testing) statistics;…
Medicago GeneChip ID	Gene	Annotation	A Mean	Meristem enrichment factor	p value	q value	Distal infection zone enrichment factor	p value	q value	Proximal infection zone enrichment factor	p value	q value	Infection zone enrichment factor	p value	q value	Infected cell enrichment factor	p value	q value	Uninfected cell enrichment factor	p value	q value	Root 0d log2	Nod4d log2	Nod10d log2	Nod14d log2	BiolFunction GO ID	GO term	MolecFunct GO ID	GO term	Gene function
Mtr.4068.1.S1_at		hypothetical protein predicted by Glimmer/Critica	6.5344	0.161727	0.00698135	0.103216	0.447649	0.189359	0.76968	0.238184	0.0266666	0.562814	0.224854	0.00683915	0.144968	26.286	4.82519e-05	0.0015417	2.20619	0.195938	0.409066	7.74079	7.29921	7.67666	7.22593	GO:0006468	protein amino acid phosphorylation	GO:0016301	kinase activity
Mtr.41051.1.S1_at		Probable serine/threonine-protein kinase WNK11 Short=AtWNK11; EC=2.7.11.1; AltName: Full=Protein kinase with no lysine 11;	5.5565	0.341849	0.118455	0.393399	0.184353	0.0196291	0.531362	0.840417	0.792331	0.88016	0.288467	0.0328103	0.300851	16.1255	0.000624514	0.0085875	1.17087	0.811156	0.662747	7.93664	7.40769	7.99718	7.83099	GO:0006468	protein amino acid phosphorylation	GO:0016301	kinase activity	KOG: Serine/threonine protein kinase
Mtr.31706.1.S1_at		protein kinase family protein	4.5397	0.423008	0.0646458	0.314764	0.435291	0.0730559	0.671482	0.543298	0.178004	0.75685	0.382424	0.0154621	0.213683	15.5101	1.20065e-05	0.000638202	0.644494	0.325156	0.489836	4.14568	5.30012	10.42	9.39167	GO:0008152 GO:0006468	metabolic process	GO:0004672 GO:0004712	protein kinase activity	KOG: Tyrosine kinase specific for activated (GTP-bound) p21cdc42Hs
Mtr.9317.1.S1_at		Protein kinase APK1A, chloroplastic EC=2.7.11.1; Flags: Precursor;	8.7532	0.249365	0.0294387	0.220929	0.667372	0.494828	0.850261	1.16889	0.790867	0.88016	0.847412	0.730617	0.774993	14.7462	0.000296695	0.00509986	0.348612	0.0880044	0.302533	9.77396	9.16063	10.7688	10.8908	GO:0006468 GO:0007169	protein amino acid phosphorylation	GO:0005524 GO:0004674	ATP binding
Mtr.916.1.S1_s_at		serine/threonine protein kinase, putative; induced by osmotic stress	6.6463	0.18535	0.00100212	0.0337384	0.332327	0.0179883	0.523796	0.307465	0.0123201	0.473569	0.218561	0.000421367	0.0318788	14.0936	1.16188e-05	0.000627226	3.74649	0.00613246	0.0714432	6.77215	7.35403	9.50621	9.37569	GO:0006970 GO:0009651	response to osmotic stress	GO:0016301	kinase activity	KOG: Serine/threonine protein kinase
Mtr.4036.1.S1_at		Receptor-like protein kinase HAIKU2 EC=2.7.11.1; Flags: Precursor;	6.2834	0.12918	0.000325357	0.017317	0.413484	0.0649776	0.663949	2.52552	0.0541396	0.636374	1.02929	0.937575	0.81302	13.8201	2.62838e-05	0.00101295	0.536394	0.180775	0.396828	8.28586	8.53683	10.1992	10.2057	GO:0006468	protein amino acid phosphorylation	GO:0016301	kinase activity	KOG: Serine/threonine protein kinase
Mtr.39939.1.S1_at		Mitogen-activated protein kinase kinase kinase ANP1 EC=2.7.11.25; AltName: Full=Arabidopsis NPK1-related kinase 1;	7.9945	0.266361	0.0240257	0.199248	0.54971	0.274722	0.800249	0.376509	0.0838239	0.684086	0.349896	0.0275763	0.279452	12.4108	0.000236054	0.00436158	1.46157	0.483274	0.556035	6.75889	8.16491	11.697	11.5198	GO:0006979 GO:0009908	response to oxidative stress	GO:0004709	MAP kinase kinase kinase activity	KOG: MEKK and related serine/threonine protein kinases
Mtr.7250.1.S1_at		Putative bark agglutinin LECRPA3 Flags: Precursor; Fragment;	8.2724	0.214551	0.0123163	0.141304	0.494381	0.213459	0.77685	0.422415	0.132717	0.722859	0.351993	0.0321636	0.298478	9.46991	0.000834394	0.0103736	2.35679	0.134591	0.355632	3.82782	6.67384	12.5695	12.1291	GO:0006468	protein amino acid phosphorylation	GO:0016301	kinase activity
Mtr.31706.1.S1_s_at		protein kinase family protein	4.2449	0.644175	0.320125	0.545715	0.374103	0.0361037	0.592052	0.747881	0.507412	0.840838	0.427775	0.0278467	0.28043	8.82097	0.000125985	0.00292908	0.629008	0.295479	0.474674	3.63227	4.80735	10.722	9.385	GO:0008152 GO:0006468	metabolic process	GO:0004672 GO:0004712	protein kinase activity	KOG: Tyrosine kinase specific for activated (GTP-bound) p21cdc42Hs
Mtr.7320.1.S1_at		hypothetical protein predicted by Glimmer/Critica	2.8948	0.557418	0.353615	0.563284	0.516357	0.296054	0.80501	0.439713	0.198253	0.764701	0.372174	0.0658008	0.394204	8.14444	0.00360745	0.0280537	0.970147	0.961075	0.697567	3.60881	3.60881	5.07895	5.15785	GO:0006468	protein amino acid phosphorylation	GO:0016301	kinase activity
Mtr.44264.1.S1_at		Putative serine/threonine-protein kinase At1g01540 EC=2.7.11.1;	3.2189	0.873089	0.814589	0.713984	0.254551	0.0292286	0.565127	0.277057	0.0390794	0.603735	0.170698	0.00166655	0.0689541	8.08206	0.00219273	0.0202013	2.00945	0.23843	0.438948	8.18488	7.41616	10.3347	10.2905	GO:0006468	protein amino acid phosphorylation	GO:0016301	kinase activity	KOG: Serine/threonine protein kinase
Mtr.49069.1.S1_s_at		Mitogen-activated protein kinase kinase kinase ANP1 EC=2.7.11.25; AltName: Full=Arabidopsis NPK1-related kinase 1;	4.8631	0.35136	0.0196734	0.180779	0.419591	0.0467823	0.630557	0.872747	0.739252	0.874731	0.51185	0.058712	0.378296	8.04845	0.000102404	0.00255298	0.965653	0.931769	0.69161	6.89118	8.26209	11.7026	11.5642	GO:0006979 GO:0009908	response to oxidative stress	GO:0004709	MAP kinase kinase kinase activity	KOG: MEKK and related serine/threonine protein kinases
Mtr.33676.1.S1_at		protein kinase, putative	4.2569	0.475911	0.102708	0.374143	0.472406	0.0996144	0.709769	1.08321	0.854235	0.886664	0.639764	0.220046	0.572954	8.00649	0.000195717	0.00386234	0.512864	0.138993	0.360063	5.87036	6.29094	5.78136	5.93546	GO:0006468	protein amino acid phosphorylation	GO:0016301	kinase activity	KOG: Putative serine/threonine protein kinase
Mtr.2532.1.S1_at		Putative serine/threonine-protein kinase At1g54610 EC=2.7.11.1;	3.1177	0.377501	0.0450933	0.268702	0.552478	0.203331	0.773778	0.515314	0.157863	0.742193	0.432771	0.0360853	0.312042	6.83384	0.000599784	0.00833716	1.36154	0.499763	0.562262	5.61765	6.28355	7.28817	6.88509	GO:0006499 GO:0006468	N-terminal protein myristoylation	GO:0005524 GO:0004672	ATP binding	KOG: Cdc2-related protein kinase
Mtr.49311.1.S1_at		pyridoxal (pyridoxine, vitamin B6) kinase	7.7946	0.191568	0.00225603	0.0544577	0.343191	0.03142	0.572145	1.18492	0.712237	0.871355	0.548888	0.124132	0.484206	6.50807	0.000825274	0.010304	1.97242	0.152848	0.373267	8.34296	9.3345	11.2413	11.0119	GO:0008615 GO:0042538 GO:0010054	pyridoxine biosynthetic process	GO:0008478	pyridoxal kinase activity	KOG: Pyridoxal/pyridoxine/pyridoxamine kinase
Mtr.11171.1.S1_at		leucine-rich repeat transmembrane protein kinase, putative	5.1514	0.276055	0.0799178	0.340565	0.73602	0.661401	0.877877	0.586672	0.448943	0.830857	0.57129	0.33325	0.641224	5.98761	0.0195466	0.0839089	1.40109	0.63009	0.60851	7.74079	8.4733	7.732	8.01625	GO:0006468 GO:0007169	protein amino acid phosphorylation	GO:0005524 GO:0016301 GO:0004674	ATP binding	KOG: Serine/threonine protein kinase
Mtr.18268.1.S1_at		CBL-interacting protein kinase 9 (CIPK9)	2.6129	0.664488	0.211421	0.47938	0.811782	0.515706	0.854096	0.483372	0.0345633	0.588497	0.535978	0.0274449	0.278712	5.87829	4.267e-05	0.00142885	0.652441	0.192713	0.406685	8.385	8.35094	9.36894	8.93221	GO:0006970 GO:0009651 GO:0009737	response to osmotic stress	GO:0016301	kinase activity	KOG: Serine/threonine protein kinase
Mtr.44840.1.S1_at		hypothetical protein predicted by Glimmer/Critica	10.7923	0.185345	0.000166397	0.0121878	0.520477	0.0742727	0.674771	0.717284	0.344801	0.813874	0.518475	0.0319396	0.297091	5.51099	0.000147253	0.00321207	2.6224	0.0125201	0.111568	7.72656	9.3072	12.8832	12.5933	GO:0008152 GO:0006468	metabolic process	GO:0004672 GO:0004712	protein kinase activity
Mtr.44507.1.S1_at		Cysteine-rich receptor-like protein kinase 25 Short=Cysteine-rich RLK25; EC=2.7.11.-; Flags: Precursor;	3.2988	0.85657	0.774998	0.704172	0.64742	0.42645	0.835883	0.518448	0.235633	0.780411	0.482978	0.114229	0.470935	5.47323	0.00590783	0.0387116	0.635481	0.407346	0.524779	3.3505	8.79799	11.1008	10.5077	GO:0006468	protein amino acid phosphorylation	GO:0016301	kinase activity
Mtr.16922.1.S1_at		Uncharacterized sugar kinase yihV EC=2.7.1.-;	4.347	0.300283	0.061786	0.308613	1.55362	0.471636	0.845025	0.348637	0.0974724	0.699229	0.664475	0.414574	0.679127	5.23243	0.0140322	0.0682143	1.17503	0.790619	0.656699	7.55766	8.15076	8.42122	8.37504	GO:0006014	D-ribose metabolic process	GO:0016301	kinase activity
Mtr.8409.1.S1_at		Putative serine/threonine-protein kinase At1g01540 EC=2.7.11.1;	3.2329	0.304263	0.0390997	0.250948	0.562086	0.291568	0.803924	0.746342	0.587074	0.855264	0.560394	0.198259	0.555086	5.18625	0.00687322	0.0426803	1.51062	0.446027	0.540791	8.66391	8.44626	9.42417	9.23625	GO:0006468	protein amino acid phosphorylation	GO:0016301	kinase activity	KOG: Serine/threonine protein kinase
Mtr.1625.1.S1_s_at		protein kinase family protein	4.0191	0.363343	0.0229764	0.195489	0.842827	0.675466	0.880286	1.0791	0.8518	0.886495	0.938713	0.849233	0.797516	4.91706	0.00117625	0.0130999	0.61543	0.244024	0.442723	6.48059	7.06609	7.57365	6.76022	GO:0008152 GO:0006468	metabolic process	GO:0004672 GO:0004712	protein kinase activity	KOG: Tyrosine kinase specific for activated (GTP-bound) p21cdc42Hs
Mtr.46106.1.S1_at		hypothetical protein	3.5107	0.554424	0.157069	0.435295	0.62149	0.248419	0.794797	0.970341	0.940438	0.894848	0.713793	0.313708	0.630103	4.79738	0.00122453	0.0134877	0.623441	0.251414	0.446969	3.39232	3.15381	3.27798	3.18587	GO:0000004	No GO term	GO:0005524	ATP binding
Mtr.45377.1.S1_s_at		Mitogen-activated protein kinase 16 Short=MAP kinase 16; Short=AtMPK16; EC=2.7.11.24;	3.129	0.625587	0.185485	0.459647	0.673556	0.26066	0.799332	0.73013	0.366974	0.815687	0.62304	0.106935	0.462339	4.6296	0.000380514	0.00602827	0.702093	0.312066	0.483705	5.60288	7.01346	7.8392	7.02015	GO:0007165	signal transduction	GO:0004707	MAP kinase activity	KOG: Mitogen-activated protein kinase
Mtr.16248.1.S1_at		Putative disease resistance RPP13-like protein 1	3.7317	0.597471	0.114577	0.389127	0.684376	0.236497	0.788843	0.894566	0.722316	0.872408	0.721004	0.212313	0.566801	4.57564	0.000167782	0.00348025	0.597481	0.114588	0.335907	4.2854	4.03562	4.24793	4.10434	GO:0006952	defense response	GO:0005524 GO:0005515	ATP binding	KOG: Apoptotic ATPase
Mtr.8890.1.S1_at		serine/threonine kinase 16	4.2666	0.60185	0.242584	0.501041	0.720849	0.445229	0.838995	0.982994	0.967777	0.897166	0.79481	0.510772	0.715415	4.42892	0.00275878	0.0236336	0.529443	0.148305	0.369271	9.8009	9.62077	9.30469	9.48442	GO:0006468	protein amino acid phosphorylation	GO:0016301	kinase activity	KOG: Serine/threonine protein kinase/TGF-beta stimulated factor
Mtr.13593.1.S1_at		Mitogen-activated protein kinase 8 Short=MAP kinase 8; EC=2.7.11.24; AltName: Full=Wound- and JA-uninducible MAP kinase 1; AltName: Full=OsWJUMK1;	3.4703	0.564745	0.224738	0.488924	0.616237	0.300353	0.806157	1.1822	0.716001	0.871716	0.809643	0.575203	0.735761	4.36103	0.0051506	0.0354635	0.557337	0.214719	0.423147	4.2854	4.99095	5.49825	5.0268	GO:0007165	signal transduction	GO:0004707	MAP kinase activity	KOG: Mitogen-activated protein kinase
Mtr.28103.1.S1_at		protein kinase family protein	1.7842	0.438619	0.0428281	0.261677	0.595557	0.184694	0.768186	0.970371	0.936792	0.89434	0.69381	0.248388	0.59142	4.33722	0.00128463	0.0139605	0.909578	0.80286	0.660376	3.90689	4.57894	8.87836	8.01625	GO:0008152 GO:0006468	metabolic process	GO:0004672 GO:0004712	protein kinase activity	KOG: Tyrosine kinase specific for activated (GTP-bound) p21cdc42Hs
Mtr.29362.1.S1_at		Cyclin-dependent kinase inhibitor 4 AltName: Full=KIP-related protein 4; AltName: Full=Inhibitor/interactor of CDK protein 7;	1.9686	0.900649	0.614722	0.660695	0.653408	0.0537505	0.647729	0.68044	0.077777	0.674482	0.582527	0.00527064	0.127859	4.20747	3.49386e-06	0.000318878	0.593538	0.0214501	0.15423	5.62352	5.10014	7.49426	7.03122	GO:0045786 GO:0045736	negative regulation of progression through cell cycle	GO:0004861 GO:0030332	cyclin-dependent protein kinase inhibitor activity
Mtr.12989.1.S1_at		Uncharacterized protein At3g61080	7.5484	0.723978	0.427668	0.594548	0.32413	0.0121744	0.476102	1.1132	0.79036	0.880084	0.50683	0.0527333	0.363077	4.14226	0.00263148	0.0229033	0.924152	0.84489	0.670928	6.73335	6.62352	8.33316	8.05637	GO:0008150	biological_process	GO:0016301	kinase activity	KOG: Predicted kinase
Mtr.44054.1.S1_at		expressed protein	7.424	0.223138	0.000856541	0.030638	0.876302	0.721149	0.885059	0.875328	0.71891	0.872272	0.837947	0.559748	0.73104	3.69881	0.00254531	0.0223999	1.57957	0.226989	0.431536	9.38586	8.79279	9.45389	9.41743	GO:0000004	No GO term	GO:0005524 GO:0005515 GO:0004765 GO:0008270	ATP binding	KOG: Predicted E3 ubiquitin ligase
Mtr.41396.1.S1_at		protein kinase, putative	9.1416	0.395991	0.00262004	0.0595109	0.683213	0.160411	0.754552	0.591704	0.05987	0.651057	0.546731	0.0116474	0.1864	3.56233	0.000174795	0.00358688	1.75356	0.0456933	0.226422	8.53333	8.33494	9.72537	9.81954	GO:0006468	protein amino acid phosphorylation	GO:0016301	kinase activity	KOG: Putative serine/threonine protein kinase
Mtr.12163.1.S1_at		Probable serine/threonine-protein kinase GCN2 EC=2.7.11.1;	2.4056	0.825674	0.450915	0.604245	0.69251	0.158112	0.753313	0.736384	0.23513	0.779865	0.638293	0.0418583	0.331724	3.54156	0.000121042	0.00283984	0.670605	0.126994	0.348334	3.71149	3.6893	3.80735	3.81762	GO:0006468	protein amino acid phosphorylation	GO:0005524 GO:0004672	ATP binding	KOG: eIF-2alpha kinase GCN2
Mtr.50931.1.S1_s_at		Probable inactive receptor kinase At2g26730 Flags: Precursor;	2.4157	0.665093	0.127214	0.404032	0.722843	0.218403	0.780329	0.753368	0.280001	0.797657	0.666859	0.0681594	0.398881	3.49415	0.00016552	0.00343679	0.790178	0.366154	0.508037	6.54535	5.27053	7.07468	6.7046	GO:0006468 GO:0007169	protein amino acid phosphorylation	GO:0005524 GO:0016301 GO:0004674	ATP binding	KOG: Serine/threonine protein kinase
Mtr.2441.1.S1_at		leucine-rich repeat transmembrane protein kinase, putative	2.0166	0.768247	0.26477	0.515578	0.820643	0.398841	0.829904	0.70317	0.142469	0.730763	0.693122	0.0670672	0.396392	3.23613	0.000110013	0.00267155	0.697042	0.133482	0.354788	4.95884	4.69488	4.94486	4.79701	GO:0010075 GO:0048229 GO:0048437 GO:0048653 GO:0010480	regulation of meristem size	GO:0005524 GO:0004674	ATP binding	KOG: Serine/threonine protein kinase
Mtr.41314.1.S1_at		pyruvate, phosphate dikinase	1.7874	0.780753	0.287211	0.528367	0.583922	0.0297198	0.565657	0.80806	0.357118	0.814101	0.606083	0.0152145	0.211662	3.11329	0.00013283	0.00302249	0.871903	0.550348	0.580532	3.05311	3.07039	3.26303	3.07039	GO:0016310	phosphorylation	GO:0016301 GO:0050242	kinase activity
Mtr.39654.1.S1_at		Cysteine-rich receptor-like protein kinase 10 Short=Cysteine-rich RLK10; EC=2.7.11.-; AltName: Full=Receptor-like protein kinase 4; Flags: Precursor;	11.4844	0.163157	6.84273e-07	0.000460751	1.12914	0.596954	0.870673	1.38741	0.165646	0.747519	1.34887	0.123591	0.483356	2.90121	0.000251803	0.00453896	1.34854	0.203166	0.414754	3.85798	10.78	12.679	12.5621	GO:0006468	protein amino acid phosphorylation	GO:0016301	kinase activity	KOG: Serine/threonine protein kinase
Mtr.7320.1.S1_s_at		hypothetical protein predicted by Glimmer/Critica	3.1048	0.804984	0.516194	0.62803	0.740091	0.370785	0.823545	0.875797	0.690143	0.867934	0.748961	0.294874	0.619989	2.89927	0.00514833	0.0354552	0.661051	0.223712	0.429099	3.18587	3.45943	5.12102	5.10852	GO:0006468	protein amino acid phosphorylation	GO:0016301	kinase activity
Mtr.2014.1.S1_at		hypothetical protein predicted by Glimmer/Critica	3.124	0.764836	0.454502	0.604896	0.948648	0.88202	0.902849	0.375336	0.013127	0.479063	0.502362	0.0287606	0.284371	2.76359	0.0106032	0.0563881	1.32872	0.428364	0.533826	2.76553	2.8679	3.20163	3.20163	GO:0006970 GO:0009651	response to osmotic stress	GO:0016301	kinase activity
Mtr.37855.1.S1_at		Probable serine/threonine-protein kinase WNK5 Short=AtWNK5; EC=2.7.11.1; AltName: Full=Protein kinase with no lysine 5;	2.9498	0.685065	0.202126	0.47213	0.653174	0.153785	0.751002	0.940475	0.83166	0.884878	0.722632	0.180913	0.542898	2.73766	0.00284042	0.0240478	0.867986	0.624976	0.606639	7.56377	6.8125	6.45779	5.86542	GO:0006468	protein amino acid phosphorylation	GO:0004672	protein kinase activity	KOG: Serine/threonine protein kinase
Mtr.13392.1.S1_at		protein kinase family	4.6035	0.68541	0.246878	0.504652	0.858782	0.634367	0.874762	1.19298	0.581964	0.854847	1.01627	0.950569	0.815557	2.67761	0.00661907	0.0415762	0.531847	0.0621077	0.260268	5.91169	5.96578	5.19377	5.04876	GO:0006468	protein amino acid phosphorylation	GO:0016301	kinase activity	KOG: Serine/threonine protein kinase
Mtr.45768.1.S1_at		Wall-associated receptor kinase-like 2 EC=2.7.11.-; Flags: Precursor;	2.0925	0.876478	0.720384	0.689736	0.708055	0.354536	0.819326	0.690148	0.321017	0.808494	0.620401	0.12631	0.486908	2.60072	0.0182072	0.0800992	0.897753	0.76949	0.650975	4.01792	4.12928	3.9542	3.60881	GO:0006468	protein amino acid phosphorylation	GO:0016301	kinase activity	KOG: Serine/threonine protein kinase
Mtr.5767.1.S1_at		Receptor-like protein kinase 5 EC=2.7.11.1; Flags: Precursor;	2.3662	0.581232	0.0202409	0.18289	0.922117	0.704007	0.882868	0.777382	0.247541	0.78463	0.800966	0.213611	0.567902	2.48906	0.000543055	0.00777302	0.96426	0.864338	0.675935	4.1127	4.30743	4.06178	4.15381	GO:0006468 GO:0007169	protein amino acid phosphorylation	GO:0005524 GO:0016301 GO:0004674	ATP binding	KOG: FOG: Leucine rich repeat
Mtr.30954.1.S1_at		protein kinase family protein	2.9069	1.01411	0.969283	0.74752	0.671875	0.283671	0.80087	0.876484	0.717658	0.871934	0.702568	0.245393	0.588893	2.46993	0.0230088	0.0929606	0.677952	0.294308	0.474104	4.10434	4	4.19377	4.32193	GO:0006468	protein amino acid phosphorylation	GO:0016301	kinase activity
Mtr.32265.1.S1_at		Probable serine/threonine-protein kinase RLCKVII EC=2.7.11.1;	3.222	0.841851	0.621722	0.662726	1.10635	0.771477	0.890686	0.797269	0.517348	0.842614	0.919739	0.768405	0.782022	2.44303	0.0193511	0.0833881	0.551238	0.101524	0.320744	4.76553	4.92125	4.78136	4.72792	GO:0006468	protein amino acid phosphorylation	GO:0016301	kinase activity
Mtr.28211.1.S1_at		Serine/threonine-protein phosphatase BSL3 EC=3.1.3.16; AltName: Full=BSU1-like protein 3;	2.0089	0.661119	0.089285	0.354985	0.803298	0.351839	0.818292	0.940742	0.792413	0.88016	0.829656	0.331577	0.640395	2.35529	0.00184979	0.0179163	0.849825	0.486319	0.556718	3.73335	3.3505	3.8679	3.62059	GO:0008150	biological_process	GO:0004722	protein serine/threonine phosphatase activity	KOG: Kelch repeat-containing proteins
Mtr.9722.1.S1_at		CBL-interacting serine/threonine-protein kinase 18 EC=2.7.11.1; AltName: Full=SOS2-like protein kinase PKS22; AltName: Full=SNF1-related kinase 3.20;	2.7929	0.694263	0.249272	0.505875	0.818524	0.520781	0.856106	1.15133	0.650215	0.864027	0.961218	0.875749	0.802903	2.34528	0.0133263	0.065832	0.651701	0.179908	0.395939	5.48543	5.97728	6.11686	5.57894	GO:0006468 GO:0007165	protein amino acid phosphorylation	GO:0016301	kinase activity	KOG: Serine/threonine protein kinase
Mtr.29064.1.S1_at		Putative receptor protein kinase ZmPK1 EC=2.7.11.1; Flags: Precursor;	3.7117	0.779533	0.471425	0.611789	0.876131	0.70041	0.882355	0.967769	0.923881	0.892745	0.895834	0.695091	0.767575	2.33207	0.0237415	0.0947313	0.648758	0.218623	0.425462	5.46271	5.10852	4.49185	4.93546	GO:0006468	protein amino acid phosphorylation	GO:0004672	protein kinase activity
Mtr.33193.1.S1_at		hypothetical protein predicted by Glimmer/Critica	2.4835	0.829524	0.550789	0.640072	0.872088	0.661336	0.877877	0.795725	0.467085	0.834916	0.783819	0.34535	0.647026	2.2651	0.0173018	0.0775913	0.766939	0.399824	0.521823	3.6893	3.54844	3.7866	3.80735	GO:0006468 GO:0007169	protein amino acid phosphorylation	GO:0005524 GO:0004674	ATP binding
Mtr.6566.1.S1_at		leucine-rich repeat transmembrane protein kinase, putative	2.7657	0.746744	0.263546	0.51472	0.941082	0.812483	0.896231	0.913526	0.724151	0.872838	0.904133	0.630684	0.750797	2.26088	0.00535261	0.0362587	0.688973	0.15897	0.378484	4.43962	4.93074	4.76553	4.75489	GO:0006468 GO:0007169	protein amino acid phosphorylation	GO:0005524 GO:0004672 GO:0004674	ATP binding
Mtr.27095.1.S1_at		protein phosphatase 2C, putative / PP2C, putative	2.1554	0.912022	0.780747	0.705922	0.739379	0.367385	0.822425	0.960555	0.903085	0.890514	0.796024	0.403335	0.6748	2.25366	0.0242622	0.0958079	0.685043	0.262387	0.45421	6.22882	6.58496	6.63227	6.56682	GO:0008150	biological_process	GO:0004722	protein serine/threonine phosphatase activity	KOG: Serine/threonine protein phosphatase
Mtr.11108.1.S1_at		protein kinase, putative	2.4984	0.585972	0.00421162	0.0776392	0.784069	0.146812	0.747194	1.01335	0.934651	0.894137	0.857848	0.256058	0.596102	2.20564	0.000158368	0.00334025	0.973808	0.869739	0.677387	8.64854	8.60733	8.53528	8.24317	GO:0006468	protein amino acid phosphorylation	GO:0016301 GO:0004712	kinase activity	KOG: Tyrosine kinase specific for activated (GTP-bound) p21cdc42Hs
Mtr.46694.1.S1_at		Serine/threonine-protein kinase 38-like EC=2.7.11.1; AltName: Full=NDR2 protein kinase; AltName: Full=Nuclear Dbf2-related kinase 2;	3.0384	0.97315	0.912077	0.737232	0.54329	0.0234632	0.546656	1.02292	0.926729	0.893168	0.675953	0.066183	0.394367	2.0727	0.00870477	0.0495947	0.89209	0.6443	0.612881	9.38716	9.63009	9.14924	9.28933	GO:0006468	protein amino acid phosphorylation	GO:0016301	kinase activity	KOG: NDR and related serine/threonine kinases

## Sheet: Uninfected cells
Supplementary table S9. Putative (receptor) protein kinase genes showing enriched expression specifically in the uninfected cells of the fixation zone. Column A: Medicago GeneChip Id; Column B: gene name; Column C: Gene Annotation; Column D: Mean expression value (log2) in all LCM samples; Column E-V: fold enrichment for each LCM cell/tissue including p and q (corrected for multiple testing) stat…
Medicago GeneChip ID	Gene	Annotation	A Mean	Meristem enrichment factor	p value	q value	Distal infection zone enrichment factor	p value	q value	Proximal infection zone enrichment factor	p value	q value	Infection zone enrichment factor	p value	q value	Infected cell enrichment factor	p value	q value	Uninfected cell enrichment factor	p value	q value	Root 0d log2	Nod4d log2	Nod10d log2	Nod14d log2	BiolFunction GO ID	GO term	MolecFunct GO ID	GO term	Gene function
Mtr.30034.1.S1_at		hypothetical protein predicted by Glimmer/Critica	3.0722	0.198271	4.19263e-05	0.00613834	0.362127	0.00280899	0.302984	0.25663	0.000240542	0.0977009	0.205169	5.52023e-06	0.00210332	0.677168	0.192315	0.312758	80.1449	1.06131e-10	7.63407e-07	8.76487	7.47573	5.96578	5.83542	GO:0006468 GO:0007169	protein amino acid phosphorylation	GO:0005524 GO:0016301 GO:0004674	ATP binding
Mtr.44364.1.S1_at		Receptor-like protein kinase 5 EC=2.7.11.1; Flags: Precursor;	4.4833	0.187729	0.0041733	0.0773009	0.44858	0.12749	0.733912	0.209753	0.00661532	0.399507	0.206871	0.00143359	0.0634493	0.796635	0.654058	0.553917	71.0659	3.14385e-07	0.000106669	9.76835	9.09038	9.53041	8.94661	GO:0006468	protein amino acid phosphorylation	GO:0016301	kinase activity	KOG: Serine/threonine protein kinase
Mtr.7367.1.S1_s_at		hypothetical protein predicted by Glimmer/Critica	4.7147	1.82967	0.518891	0.629277	0.577986	0.557839	0.863814	0.363831	0.28622	0.798709	0.353626	0.183987	0.54589	0.0579604	0.00699364	0.0431699	44.8414	0.000811305	0.0182724	7.24508	7.98641	8.54381	8.72996	GO:0006468 GO:0007165	protein amino acid phosphorylation	GO:0016301	kinase activity
Mtr.18703.1.S1_at		CBL-interacting protein kinase 23 (CIPK23)	5.803	3.52422	0.0931683	0.361892	0.67815	0.58887	0.868705	0.153066	0.0173274	0.516256	0.22087	0.0187336	0.234256	0.0665848	0.00151952	0.015687	41.0542	8.65362e-05	0.00423442	11.641	10.7244	10.2053	10.4217	GO:0006468 GO:0007165	protein amino acid phosphorylation	GO:0016301	kinase activity	KOG: Serine/threonine protein kinase
Mtr.40027.1.S1_at		CBL-interacting protein kinase 23 (CIPK23)	6.9235	0.17585	0.00307574	0.0649126	1.87616	0.222815	0.783023	0.49016	0.170035	0.751337	0.945668	0.891909	0.806265	0.162224	0.00219553	0.0202103	38.1184	2.12983e-06	0.000368269	10.4839	9.10617	10.1883	10.2035	GO:0006468 GO:0007165	protein amino acid phosphorylation	GO:0016301	kinase activity	KOG: Serine/threonine protein kinase
Mtr.43966.1.S1_at		Putative wall-associated receptor kinase-like 20 EC=2.7.11.-; Flags: Precursor;	5.5183	0.968469	0.96472	0.74659	0.294631	0.106544	0.717038	0.912695	0.899663	0.890392	0.416616	0.152721	0.515879	0.120664	0.00942157	0.0521795	31.8223	0.000198461	0.00750626	9.91244	8.7039	8.51491	8.51136	GO:0006468 GO:0007169	protein amino acid phosphorylation	GO:0005524 GO:0004674	ATP binding	KOG: Serine/threonine protein kinase
Mtr.44429.1.S1_at		Wall-associated receptor kinase-like 14 EC=2.7.11.-; Flags: Precursor;	4.0749	0.763544	0.667793	0.675958	0.46088	0.2278	0.785356	0.283498	0.0584933	0.648067	0.257489	0.0163962	0.219387	0.329172	0.0912229	0.208464	30.4513	5.26119e-05	0.00307098	9.20384	8.52591	8.633	8.46638	GO:0006468	protein amino acid phosphorylation	GO:0016301	kinase activity	KOG: Serine/threonine protein kinase
Mtr.30688.1.S1_at		putative receptor kinase	3.6724	0.163562	0.00197071	0.0503241	0.630247	0.356964	0.820437	0.234309	0.00907991	0.440791	0.279383	0.00568307	0.132156	1.45899	0.448887	0.470185	28.3769	4.6794e-06	0.000637485	7.20945	6.90569	5.62644	5.92125	GO:0006468	protein amino acid phosphorylation	GO:0016301	kinase activity
Mtr.8844.1.S1_at		Probable serine/threonine-protein kinase WNK5 Short=AtWNK5; EC=2.7.11.1; AltName: Full=Protein kinase with no lysine 5;	7.4398	0.481169	0.224493	0.488722	0.943367	0.920952	0.906147	1.19618	0.760756	0.876949	1.08389	0.866675	0.800951	0.066742	0.000279103	0.00488758	27.5947	3.61268e-05	0.00244231	10.764	9.21067	8.66534	8.73539	GO:0006468	protein amino acid phosphorylation	GO:0004672	protein kinase activity	KOG: Serine/threonine protein kinase
Mtr.40630.1.S1_at		serine/threonine protein kinase, putative	4.4324	0.463982	0.195163	0.467416	0.473481	0.206569	0.775066	0.602855	0.385775	0.819246	0.433521	0.0906345	0.441316	0.316349	0.0600669	0.163353	23.868	4.73262e-05	0.00288003	9.46822	8.84643	8.42836	8.75154	GO:0006468	protein amino acid phosphorylation	GO:0016301	kinase activity	KOG: Serine/threonine protein kinase
Mtr.43418.1.S1_s_at		Cysteine-rich receptor-like protein kinase 10 Short=Cysteine-rich RLK10; EC=2.7.11.-; AltName: Full=Receptor-like protein kinase 4; Flags: Precursor;	7.6387	0.359829	0.156539	0.434578	0.278027	0.0813272	0.682234	0.0971442	0.00387181	0.337843	0.0900194	0.000607051	0.0392025	4.47163	0.0449734	0.138099	23.0109	0.000349718	0.010716	5.9472	7.64458	10.8903	10.8024	GO:0006468	protein amino acid phosphorylation	GO:0016301	kinase activity	KOG: Serine/threonine protein kinase
Mtr.38165.1.S1_at		CBL-interacting protein kinase 18 EC=2.7.11.1; AltName: Full=OsCIPK18;	6.4422	0.957822	0.939387	0.741839	1.32879	0.617387	0.871961	0.41477	0.134877	0.724049	0.672215	0.396382	0.671209	0.0835117	0.000443558	0.00672251	22.6833	4.71021e-05	0.00287613	9.24317	8.97441	10.9356	10.2105	GO:0006468 GO:0007165	protein amino acid phosphorylation	GO:0016301	kinase activity	KOG: Serine/threonine protein kinase
Mtr.45211.1.S1_at		Phosphoenolpyruvate carboxykinase [ATP] Short=PEP carboxykinase; Short=PEPCK; EC=4.1.1.49; AltName: Full=Phosphoenolpyruvate carboxylase;	3.6297	1.21013	0.773995	0.703941	0.228908	0.0388488	0.601203	0.326638	0.106584	0.706827	0.177481	0.00532404	0.12829	0.507976	0.315412	0.400234	21.7568	0.000259911	0.00894524	7.84298	7.38284	6.34696	6.23266	GO:0006094	gluconeogenesis	GO:0005524 GO:0004612	ATP binding
Mtr.8212.1.S1_at		Putative serine/threonine-protein kinase At1g18390 EC=2.7.11.1; Flags: Precursor;	2.6063	0.405191	0.00283626	0.0622755	0.507024	0.0173102	0.520393	0.437043	0.00524718	0.367681	0.366186	0.000207183	0.0207249	0.520848	0.0213969	0.0889328	21.3834	3.32254e-09	5.69029e-06	7.64674	6.77742	5.54226	6.08746	GO:0006468	protein amino acid phosphorylation	GO:0016301	kinase activity
Mtr.36177.1.S1_at		protein serine/threonine kinase-related protein	5.6761	0.146421	0.00368833	0.0723724	0.259414	0.0293338	0.56521	0.579529	0.346278	0.813874	0.282735	0.0145046	0.206989	2.33595	0.151091	0.274694	19.4475	8.55696e-05	0.00421898	7.89905	8.31877	9.36807	8.92659	GO:0006468 GO:0007169	protein amino acid phosphorylation	GO:0005524 GO:0004674	ATP binding
Mtr.2372.1.S1_at		receptor serine/threonine kinase, putative	5.1125	0.864492	0.771555	0.703211	0.338329	0.0436013	0.618194	0.21248	0.00656071	0.397779	0.172891	0.000533087	0.0367185	0.868791	0.779111	0.594762	18.5211	2.57135e-05	0.0019423	8.4545	8.79149	7.45861	7.95884	GO:0006468	protein amino acid phosphorylation	GO:0016301	kinase activity	KOG: Serine/threonine protein kinase
Mtr.38430.1.S1_at		SNF1 like protein kinase (CBL-interacting protein kinase)	6.4235	1.08914	0.889149	0.732054	1.06174	0.92209	0.906147	0.467483	0.225827	0.77692	0.626886	0.35723	0.652811	0.104261	0.00186282	0.0180006	17.7425	0.000233646	0.0084369	6.62352	6.91409	10.2702	9.69957	GO:0000004	No GO term	GO:0016301	kinase activity	KOG: Serine/threonine protein kinase
Mtr.25105.1.S1_at		protein kinase, putative	3.1497	0.269997	0.0460989	0.271449	0.813264	0.73653	0.886698	1.07402	0.907315	0.890865	0.913753	0.85711	0.798798	0.240547	0.0318305	0.1129	17.6278	0.000241537	0.00858288	9.50024	8.57705	8.35667	8.6077	GO:0006468	protein amino acid phosphorylation	GO:0016301	kinase activity	KOG: Serine/threonine protein kinase
Mtr.12293.1.S1_at		Cysteine-rich receptor-like protein kinase 18 Short=Cysteine-rich RLK18; EC=2.7.11.-; Flags: Precursor;	4.254	0.850382	0.791967	0.708393	0.256914	0.0395126	0.60272	0.524444	0.301685	0.804002	0.26282	0.015902	0.215782	0.524996	0.302446	0.39168	16.6243	0.000295718	0.00973063	9.00197	8.80155	8.11478	8.90749	GO:0006468	protein amino acid phosphorylation	GO:0016301	kinase activity
Mtr.38320.1.S1_at		Serine/threonine-protein kinase PBS1 EC=2.7.11.1; AltName: Full=AvrPphB susceptible protein 1;	3.5393	0.476506	0.121127	0.396497	0.732001	0.500064	0.851257	0.451026	0.0978615	0.699229	0.477685	0.0631681	0.387907	0.387416	0.0527468	0.15166	16.4074	1.57059e-05	0.0013913	9.24174	8.22978	8.79116	8.40259	GO:0006468	protein amino acid phosphorylation	GO:0016301	kinase activity	KOG: Serine/threonine protein kinase
Mtr.50280.1.S1_s_at		Cysteine-rich receptor-like protein kinase 8 Short=Cysteine-rich RLK8; EC=2.7.11.-; Flags: Precursor;	3.7061	0.125912	0.00163751	0.0451174	0.378735	0.0936837	0.700753	5.97758	0.00483276	0.361186	1.72415	0.237916	0.584243	0.21489	0.0124595	0.0627352	16.3252	0.000113299	0.00514859	6.95652	5.7252	4.90689	5.25927	GO:0006468	protein amino acid phosphorylation	GO:0016301	kinase activity	KOG: Serine/threonine protein kinase
Mtr.43859.1.S1_at		putative serine/threonine protein kinase	3.6214	2.52319	0.184519	0.458932	0.280152	0.0749869	0.676137	0.305202	0.0946097	0.696382	0.194083	0.00855079	0.16146	0.298108	0.0888122	0.205268	15.5488	0.000874186	0.0192493	8.31424	8.80413	9.03452	9.26655	GO:0006633 GO:0006468	fatty acid biosynthetic process	GO:0016301	kinase activity	KOG: Serine/threonine protein kinase
Mtr.7605.1.S1_x_at		Putative cysteine-rich receptor-like protein kinase 31 Short=Cysteine-rich RLK31; EC=2.7.11.-; Flags: Precursor;	1.8636	0.50555	0.227748	0.490797	0.508901	0.23207	0.786065	0.470058	0.184217	0.760234	0.385351	0.0477923	0.348614	0.577945	0.328181	0.407746	14.3075	0.000181189	0.00701968	5.63227	5.12102	3.65535	3.66676	GO:0006468	protein amino acid phosphorylation	GO:0004672	protein kinase activity
Mtr.44358.1.S1_at		Probable receptor-like protein kinase At3g46290 EC=2.7.11.-; Flags: Precursor;	3.7164	1.72178	0.23853	0.498668	0.593589	0.257038	0.797815	0.210365	0.00301929	0.310016	0.249827	0.00157224	0.0669011	0.328665	0.0236819	0.094641	14.1517	2.31398e-05	0.00181313	8.09011	8.12722	8.60066	8.14006	GO:0006468	protein amino acid phosphorylation	GO:0016301	kinase activity	KOG: Serine/threonine protein kinase
Mtr.16849.1.S1_at		Putative serine/threonine-protein kinase receptor EC=2.7.11.1; AltName: Full=S-receptor kinase; Short=SRK; Flags: Precursor;	2.6997	0.70025	0.378768	0.574257	0.3169	0.0103162	0.461148	0.741683	0.458697	0.832634	0.380855	0.00868082	0.162536	0.456743	0.064356	0.170346	13.3026	7.86726e-06	0.000885247	6.45286	5.1334	4.30743	4.30012	GO:0006468	protein amino acid phosphorylation	GO:0004672	protein kinase activity	KOG: Serine/threonine protein kinase
Mtr.6696.1.S1_at		protein kinase (APK1a)	3.2214	0.605309	0.41985	0.591066	1.2892	0.680697	0.880364	0.475395	0.238022	0.781559	0.721523	0.518995	0.717806	0.202891	0.0185495	0.0810637	13.2857	0.000641718	0.015754	5.56986	6.32553	7.11686	7.87467	GO:0006468	protein amino acid phosphorylation	GO:0016301	kinase activity	KOG: Serine/threonine protein kinase
Mtr.14475.1.S1_at		Mitogen-activated protein kinase kinase 5 Short=MAP kinase kinase 5; Short=AtMKK5; Short=AtMAP2Kalpha; EC=2.7.12.2;	3.8652	0.316757	0.0523227	0.28676	1.02061	0.970698	0.910234	0.577776	0.33104	0.810673	0.703203	0.442057	0.690715	0.410287	0.123431	0.246179	13.0487	0.000269988	0.00917788	11.3154	10.4059	9.11634	9.76868	GO:0006468	protein amino acid phosphorylation	GO:0004708	MAP kinase kinase activity	KOG: Mitogen-activated protein kinase kinase (MAP2K)
Mtr.41401.1.S1_at		Receptor-like protein kinase 2 EC=2.7.11.1; Flags: Precursor;	4.4715	3.07332	0.190522	0.463485	0.187355	0.0586478	0.65983	0.186726	0.0581989	0.64784	0.106966	0.00437442	0.117005	0.727567	0.703342	0.571009	12.7835	0.00704975	0.0782791	7.94953	8.06232	8.05311	8.34784	GO:0006468	protein amino acid phosphorylation	GO:0005515 GO:0004672	protein binding	KOG: Serine/threonine protein kinase
Mtr.12093.1.S1_at		protein kinase family protein	4.8646	0.194916	0.00778215	0.110175	1.09025	0.873632	0.900974	0.626629	0.395162	0.820769	0.775694	0.568855	0.733747	0.618527	0.382456	0.43857	12.1411	0.000285301	0.00950087	8.84768	8.11009	7.34163	7.76222	GO:0006468 GO:0006950	protein amino acid phosphorylation	GO:0016301	kinase activity
Mtr.4045.1.S1_at		Serine/threonine-protein kinase BRI1-like 2 EC=2.7.11.1; AltName: Full=BRASSINOSTEROID INSENSITIVE 1-like protein 2; AltName: Full=Protein VASCULAR HIGHWAY 1; Flags: Precursor;	5.1787	0.0858364	0.00227359	0.0546945	0.331625	0.120658	0.728074	5.8017	0.0191571	0.532034	1.54692	0.43842	0.688896	0.517831	0.34235	0.415931	11.6933	0.00224779	0.0364648	9.07708	8.53138	6.43962	6.94369	GO:0006468 GO:0007169	protein amino acid phosphorylation	GO:0005524 GO:0004674	ATP binding	KOG: Serine/threonine protein kinase
Mtr.7605.1.S1_at		Putative cysteine-rich receptor-like protein kinase 31 Short=Cysteine-rich RLK31; EC=2.7.11.-; Flags: Precursor;	2.026	0.557032	0.305939	0.538284	0.544407	0.288037	0.802878	0.617867	0.396906	0.820769	0.483666	0.12775	0.487785	0.483056	0.207174	0.325193	11.0485	0.000548557	0.0142455	6.10643	5.06609	3.3505	3.59694	GO:0006468	protein amino acid phosphorylation	GO:0004672	protein kinase activity
Mtr.449.1.S1_at		BRASSINOSTEROID INSENSITIVE 1-associated receptor kinase 1 Short=BRI1-associated receptor kinase 1; EC=2.7.11.1; AltName: Full=Somatic embryogenesis receptor-like kinase 3; Flags: Precursor;	2.4517	0.535009	0.0542113	0.291316	0.573041	0.0827957	0.68561	0.508802	0.0393781	0.603735	0.4397	0.00424274	0.1158	0.584208	0.0929595	0.210559	10.9733	7.70012e-07	0.000190205	7.69	8.39232	9.1046	8.64926	GO:0006468 GO:0007169	protein amino acid phosphorylation	GO:0005524 GO:0004674	ATP binding	KOG: Serine/threonine protein kinase
Mtr.37857.1.S1_at		protein kinase (APK1a)	6.1071	0.668856	0.565526	0.644854	0.268842	0.0739061	0.673605	1.09825	0.892921	0.889617	0.443402	0.165966	0.528587	0.463307	0.278501	0.376147	10.9295	0.00318929	0.0465518	10.8903	10.1797	9.55746	9.5216	GO:0006468	protein amino acid phosphorylation	GO:0016301	kinase activity	KOG: Serine/threonine protein kinase
Mtr.17910.1.S1_at		Cysteine-rich receptor-like protein kinase 25 Short=Cysteine-rich RLK25; EC=2.7.11.-; Flags: Precursor;	3.9915	1.77091	0.297375	0.533522	0.521242	0.237293	0.789057	0.325909	0.0510914	0.631893	0.306731	0.0152156	0.211662	0.320624	0.0481822	0.144077	10.3674	0.000479706	0.0130901	9.84078	9.08242	8.56529	8.58984	GO:0006468	protein amino acid phosphorylation	GO:0016301	kinase activity	KOG: Serine/threonine protein kinase
Mtr.18298.1.S1_at		leucine-rich repeat transmembrane protein kinase, putative	2.8532	0.44981	0.0973197	0.367048	0.573793	0.238023	0.789119	0.700748	0.443814	0.829393	0.544768	0.120466	0.479225	0.54118	0.19437	0.314269	10.2167	0.000114171	0.00516801	9.31084	9.1809	9.12102	8.97241	GO:0006468	protein amino acid phosphorylation	GO:0016301	kinase activity	KOG: FOG: Leucine rich repeat
Mtr.129.1.S1_at		serine/threonine protein kinase, putative	5.2178	4.21065	0.00285141	0.0623993	0.660285	0.32174	0.811622	0.555682	0.167376	0.74841	0.512514	0.0612904	0.383881	0.0648179	5.88416e-06	0.000424062	9.98614	4.07057e-05	0.00262835	8.28771	8.62644	8.91528	8.87836	GO:0006970 GO:0009651	response to osmotic stress	GO:0016301	kinase activity	KOG: Serine/threonine protein kinase
Mtr.30850.1.S1_at		Cysteine-rich receptor-like protein kinase 42 Short=Cysteine-rich RLK42; EC=2.7.11.-; Flags: Precursor;	3.8516	3.14233	0.0510522	0.284037	0.213523	0.0118698	0.476102	0.813281	0.707633	0.870214	0.31126	0.018227	0.231782	0.185764	0.00700235	0.0431738	9.86507	0.00069558	0.0164909	6.76686	6.49346	7.27612	6.89966	GO:0006468	protein amino acid phosphorylation	GO:0016301	kinase activity
Mtr.26005.1.S1_s_at		U-box domain-containing protein 33 AltName: Full=Plant U-box protein 33; Includes: RecName: Full=E3 ubiquitin ligase; EC=6.3.2.-; Includes: RecName: Full=Serine/threonine-protein kinase; EC=2.7.11.-;	3.8464	0.593136	0.30062	0.534933	0.742908	0.551105	0.862367	0.17678	0.00280705	0.304576	0.258372	0.00386529	0.110434	1.35531	0.542078	0.510654	9.47195	0.000322751	0.0102213	9.22954	8.29875	9.10774	8.83447	GO:0006468 GO:0016567	protein amino acid phosphorylation	GO:0016301	kinase activity	KOG: Serine/threonine protein kinase
Mtr.20953.1.S1_at		Cysteine-rich receptor-like protein kinase 10 Short=Cysteine-rich RLK10; EC=2.7.11.-; AltName: Full=Receptor-like protein kinase 4; Flags: Precursor;	2.7732	0.521299	0.288143	0.529053	0.585056	0.379217	0.824456	0.549005	0.326819	0.810141	0.469011	0.137684	0.497996	0.653328	0.482921	0.485224	9.14131	0.00191898	0.0327093	4.67807	5.61471	4.72792	4.90207	GO:0006468	protein amino acid phosphorylation	GO:0016301	kinase activity	KOG: Serine/threonine protein kinase
Mtr.44280.1.S1_at		Probable serine/threonine-protein kinase NAK EC=2.7.11.1;	4.5394	0.480777	0.22798	0.490899	1.00903	0.987893	0.911483	2.15801	0.206535	0.768844	1.67999	0.292736	0.618611	0.105505	0.00150158	0.015555	9.05367	0.00176602	0.0310089	10.2292	9.43754	9.21286	9.23098	GO:0006468	protein amino acid phosphorylation	GO:0016301	kinase activity	KOG: Serine/threonine protein kinase
Mtr.42942.1.S1_at		Auxin-regulated dual specificity cytosolic kinase	3.4045	0.961663	0.950546	0.74386	0.228853	0.0308218	0.570409	1.81567	0.351027	0.814101	0.556837	0.265221	0.60204	0.278226	0.0564809	0.157508	8.99472	0.00287469	0.0430539	8.33047	8.17692	8.26115	8.224	GO:0006468	protein amino acid phosphorylation	GO:0016301	kinase activity	KOG: Serine/threonine protein kinase
Mtr.45101.1.S1_at		Probable inactive receptor kinase At5g58300 Flags: Precursor;	2.9353	0.338965	0.00967629	0.123137	0.554674	0.127918	0.733912	0.943	0.874755	0.889292	0.649182	0.168596	0.531137	0.627073	0.221482	0.33605	8.9945	2.2413e-05	0.00176774	9.91364	8.56529	6.98299	7.15886	GO:0006468 GO:0007169	protein amino acid phosphorylation	GO:0005524 GO:0016301 GO:0004674	ATP binding	KOG: Serine/threonine protein kinase
Mtr.21466.1.S1_at		Putative serine/threonine-protein kinase receptor EC=2.7.11.1; AltName: Full=S-receptor kinase; Short=SRK; Flags: Precursor;	3.1542	0.624928	0.3056	0.538189	1.05348	0.908018	0.905103	0.533904	0.177122	0.756692	0.681385	0.305872	0.626305	0.355545	0.0337733	0.116913	8.00178	0.000276397	0.00928168	8.85362	7.61471	8.30652	8.40599	GO:0006468	protein amino acid phosphorylation	GO:0004672 GO:0005529	protein kinase activity	KOG: Serine/threonine protein kinase
Mtr.46819.1.S1_s_at		leucine-rich repeat transmembrane protein kinase, putative	2.6463	0.484431	0.131983	0.410218	0.388995	0.0554533	0.651448	0.47887	0.126377	0.714732	0.326168	0.00859072	0.161657	1.38551	0.484824	0.486257	7.99826	0.000354271	0.0107763	9.43484	7.86233	8.1533	8.16942	GO:0006468 GO:0007172 GO:0007169 GO:0030154	protein amino acid phosphorylation	GO:0005524 GO:0016301 GO:0004674	ATP binding	KOG: FOG: Leucine rich repeat
Mtr.45520.1.S1_at		Receptor protein kinase-like protein At4g34220 Flags: Precursor;	3.5916	0.662724	0.304557	0.537615	1.02563	0.948736	0.909021	0.53788	0.129743	0.718985	0.672643	0.22862	0.57876	0.347351	0.0152689	0.0718801	7.87448	7.88496e-05	0.00401678	8.70217	9.91394	10.6347	10.3367	GO:0006468 GO:0007169	protein amino acid phosphorylation	GO:0005524 GO:0016301 GO:0004674	ATP binding	KOG: Serine/threonine protein kinase
Mtr.30663.1.S1_s_at		CBL-interacting protein kinase 23 (CIPK23)	7.2133	0.380521	0.0279973	0.215358	0.702412	0.388617	0.826994	0.585396	0.198174	0.764701	0.552961	0.0879252	0.436536	0.81447	0.613549	0.537929	7.84702	0.000106075	0.00491625	9.37091	8.7286	9.37287	9.30081	GO:0009628 GO:0009845 GO:0009737	response to abiotic stimulus	GO:0016301	kinase activity	KOG: Serine/threonine protein kinase
Mtr.38424.1.S1_at		Cysteine-rich receptor-like protein kinase 37 Short=Cysteine-rich RLK37; EC=2.7.11.-; Flags: Precursor;	4.6512	3.19951	0.0424244	0.260635	0.819685	0.710265	0.883487	0.522521	0.235251	0.779865	0.568199	0.206935	0.562189	0.0930205	0.000387301	0.00610089	7.8449	0.00131558	0.0255206	8.87252	8.53799	7.51491	7.66534	GO:0006468	protein amino acid phosphorylation	GO:0016301	kinase activity	KOG: Serine/threonine protein kinase
Mtr.21783.1.S1_s_at		hypothetical protein predicted by Glimmer/Critica	3.708	0.393934	0.0289917	0.219517	0.596529	0.200997	0.773496	0.245973	0.00241123	0.286707	0.278193	0.00100298	0.0522864	2.21646	0.0569775	0.15844	7.80545	8.10122e-05	0.004075	3.01792	3.32193	6.26679	6.34341	GO:0006468	protein amino acid phosphorylation	GO:0004672	protein kinase activity
Mtr.38011.1.S1_s_at		Serine/threonine-protein kinase OXI1 EC=2.7.11.1; AltName: Full=Protein OXIDATIVE SIGNAL-INDUCIBLE 1;	3.4602	1.51849	0.327724	0.549636	0.46799	0.0855881	0.691146	0.411669	0.048103	0.623101	0.333572	0.00521926	0.127332	0.442017	0.066473	0.173694	7.73327	0.000164456	0.00655371	4.03562	5.94486	5.22882	6.05528	GO:0006468	protein amino acid phosphorylation	GO:0016301	kinase activity	KOG: Putative serine/threonine protein kinase
Mtr.4065.1.S1_at		Putative receptor protein kinase ZmPK1 EC=2.7.11.1; Flags: Precursor;	7.7844	3.10849	0.00333299	0.0683427	2.14363	0.0336284	0.582482	2.24527	0.025446	0.557204	2.85065	0.00129996	0.0604111	0.00886045	2.46222e-10	2.06148e-06	7.54359	1.59859e-05	0.00140916	11.5584	10.8834	10.3183	10.5814	GO:0006468	protein amino acid phosphorylation	GO:0016301 GO:0030246	kinase activity	KOG: Serine/threonine protein kinase
Mtr.40821.1.S1_at		serine/threonine protein kinase, putative	7.1189	0.421938	0.0608663	0.306016	0.660044	0.345122	0.817494	0.605294	0.257098	0.78825	0.54245	0.0989755	0.453651	0.800102	0.608504	0.536107	7.41425	0.000271652	0.00918737	11.1191	10.7872	11.5903	11.3622	GO:0006970 GO:0009651 GO:0009737 GO:0009738 GO:0009789	response to osmotic stress	GO:0016301 GO:0004672	kinase activity	KOG: Serine/threonine protein kinase
Mtr.18706.1.S1_at		Leucine-rich repeat receptor protein kinase EXS EC=2.7.11.1; AltName: Full=Extra sporogenous cells protein; AltName: Full=Protein EXCESS MICROSPOROCYTES 1; Flags: Precursor;	2.8132	0.415939	0.0350111	0.238591	0.622464	0.230055	0.785397	0.892451	0.768189	0.878199	0.67577	0.22457	0.576025	0.623128	0.231056	0.343609	6.94536	0.000120322	0.00535571	5.40939	5.90207	7.39917	7.30195	GO:0006468 GO:0007169 GO:0009793	protein amino acid phosphorylation	GO:0005524 GO:0004674	ATP binding	KOG: Serine/threonine protein kinase
Mtr.14072.1.S1_at		Nodulation receptor kinase EC=2.7.11.1; AltName: Full=Does not make infections protein 2; AltName: Full=Symbiosis receptor-like kinase; AltName: Full=MtSYMRK; Flags: Precursor;	5.8118	2.87365	0.0362222	0.242721	0.301303	0.0195082	0.531362	0.423827	0.0812008	0.680445	0.253588	0.00228119	0.0817898	0.398798	0.0636646	0.169339	6.83315	0.000774314	0.017705	8.85487	8.10696	7.59694	7.85674	GO:0006468	protein amino acid phosphorylation	GO:0016301 GO:0005515 GO:0004672	kinase activity	KOG: Serine/threonine protein kinase
Mtr.26293.1.S1_s_at		Protein STRUBBELIG-RECEPTOR FAMILY 8 AltName: Full=Leucine-rich repeat receptor kinase-like protein SRF8; Flags: Precursor;	2.3324	0.655093	0.348454	0.560439	0.624527	0.298372	0.806095	0.516359	0.151048	0.737082	0.470257	0.0514159	0.359263	0.700695	0.428481	0.460377	6.75562	0.000526781	0.0138523	8.59842	5.30012	4.14568	4.7866	GO:0032491	detection of molecule of fungal origin	GO:0016301 GO:0005057 GO:0019199	kinase activity	KOG: Serine/threonine protein kinase
Mtr.50280.1.S1_at		Cysteine-rich receptor-like protein kinase 8 Short=Cysteine-rich RLK8; EC=2.7.11.-; Flags: Precursor;	3.4727	0.216037	0.0090174	0.11858	0.601634	0.337032	0.815349	2.80168	0.0624491	0.654261	1.41634	0.418438	0.6806	0.406499	0.0990916	0.218345	6.75559	0.00196552	0.0331725	3.62059	3.26303	3.01792	3.23266	GO:0006468	protein amino acid phosphorylation	GO:0016301	kinase activity	KOG: Serine/threonine protein kinase
Mtr.12575.1.S1_at		protein kinase family protein	6.0873	3.08036	0.0668332	0.318209	0.437787	0.167617	0.760419	1.00501	0.993115	0.899922	0.578482	0.2577	0.597233	0.112184	0.0015658	0.0159909	6.57709	0.00471774	0.0602966	10.6604	9.68457	9.06663	9.08534	GO:0006468	protein amino acid phosphorylation	GO:0016301	kinase activity	KOG: Putative serine/threonine protein kinase
Mtr.30669.1.S1_at		leucine-rich repeat transmembrane protein kinase, putative	5.1864	2.48072	0.0843526	0.347894	0.859401	0.762359	0.889932	0.445801	0.12112	0.712421	0.527503	0.131946	0.493292	0.165298	0.00226942	0.0207109	6.36527	0.00183295	0.0317699	8.6388	8.95099	8.81538	9.00955	GO:0006468 GO:0007169	protein amino acid phosphorylation	GO:0005524 GO:0016301 GO:0004674	ATP binding
Mtr.23865.1.S1_at		LRR receptor-like serine/threonine-protein kinase	7.7054	0.392121	0.0988262	0.369213	0.871855	0.800276	0.893744	0.392592	0.0992229	0.700774	0.489318	0.120708	0.479278	1.21596	0.718601	0.575964	6.1274	0.00383902	0.0527998	5.90448	6.27798	9.90238	11.2903	GO:0006952 GO:0007165	defense response	GO:0005515	protein binding	KOG: FOG: Leucine rich repeat
Mtr.42199.1.S1_at		Receptor-like protein kinase 5 EC=2.7.11.1; Flags: Precursor;	2.8464	0.537325	0.115894	0.390867	0.902761	0.787371	0.893258	0.418904	0.0335615	0.581541	0.522948	0.0497449	0.35472	0.837654	0.641246	0.549025	5.87504	0.000244054	0.00858288	9.42333	8.19623	6.07039	6.38198	GO:0006468	protein amino acid phosphorylation	GO:0005524 GO:0004672	ATP binding	KOG: Serine/threonine protein kinase
Mtr.15104.1.S1_at		Probable receptor-like protein kinase At3g46290 EC=2.7.11.-; Flags: Precursor;	2.8024	1.19187	0.639733	0.668619	0.401188	0.0249844	0.550114	0.544689	0.118718	0.712294	0.362797	0.00403926	0.113092	0.671068	0.294626	0.387123	5.72149	0.000247001	0.00863119	7.59917	7.60881	7.19081	6.71562	GO:0046777	protein amino acid autophosphorylation	GO:0016301 GO:0004672	kinase activity	KOG: Serine/threonine protein kinase
Mtr.11285.1.S1_at		Wall-associated receptor kinase-like 14 EC=2.7.11.-; Flags: Precursor;	2.7882	0.648135	0.195318	0.467416	0.540584	0.0735776	0.672541	0.776535	0.441702	0.82926	0.560638	0.0424677	0.333243	0.658901	0.211907	0.328783	5.57815	7.3181e-05	0.00381999	9.65087	9.42606	9.00899	9.08534	GO:0006468	protein amino acid phosphorylation	GO:0016301	kinase activity	KOG: Serine/threonine protein kinase
Mtr.48882.1.S1_at		Serine/threonine-protein kinase HT1 EC=2.7.11.1; AltName: Full=High leaf temperature protein 1;	4.2882	0.761843	0.609621	0.659137	0.963642	0.944337	0.908459	0.485118	0.185533	0.760578	0.602341	0.252245	0.593292	0.508187	0.213766	0.330123	5.5252	0.00499473	0.0626566	7.81314	7.08321	8.95594	8.7139	GO:0006468	protein amino acid phosphorylation	GO:0016301	kinase activity	KOG: Tyrosine kinase specific for activated (GTP-bound) p21cdc42Hs
Mtr.8919.1.S1_at		protein kinase, putative	6.8356	2.07053	0.161507	0.439808	0.422179	0.10137	0.711377	0.553046	0.249408	0.784643	0.379174	0.0294911	0.287771	0.402565	0.0853612	0.200465	5.13835	0.00466822	0.0599407	9.66	9.37829	9.80526	9.89087	GO:0006468	protein amino acid phosphorylation	GO:0016301	kinase activity	KOG: Serine/threonine protein kinase
Mtr.32259.1.S1_at		Serine/threonine-protein kinase SRK2I EC=2.7.11.1; AltName: Full=Protein ATHPROKIN B; AltName: Full=OST1-kinase-like 2; AltName: Full=SNF1-related kinase 2.3; Short=SnRK2.3;	3.9587	0.391679	0.0285625	0.217714	1.21834	0.617825	0.871961	0.42561	0.0433274	0.61315	0.645436	0.186575	0.547884	0.965453	0.928937	0.634975	5.09986	0.000740393	0.0172037	8.6994	7.87836	8.36894	8.25219	GO:0006970 GO:0009651 GO:0009737 GO:0009738 GO:0009789	response to osmotic stress	GO:0016301 GO:0004672	kinase activity
Mtr.42878.1.S1_at		CBL-interacting serine/threonine-protein kinase 11 EC=2.7.11.1; AltName: Full=SOS2-like protein kinase PKS5; AltName: Full=SNF1-related kinase 3.22; AltName: Full=SOS3-interacting protein 4;	3.1324	0.828688	0.568401	0.645753	0.76609	0.421138	0.834405	0.557731	0.0897479	0.691028	0.567287	0.0475715	0.347489	0.563634	0.0951491	0.213409	5.01079	0.000149387	0.0062041	9.54129	8.33673	7.11998	7.60659	GO:0006468 GO:0007165	protein amino acid phosphorylation	GO:0016301	kinase activity	KOG: Serine/threonine protein kinase
Mtr.12458.1.S1_at		protein kinase, putative	7.686	1.47845	0.238603	0.498678	2.13689	0.0306203	0.570409	0.69048	0.263175	0.792275	1.29605	0.334665	0.641993	0.0951262	2.03892e-06	0.000238161	4.81903	0.000170571	0.00670141	10.2657	10.6713	10.0358	10.3307	GO:0006468	protein amino acid phosphorylation	GO:0016301	kinase activity	KOG: Serine/threonine protein kinase
Mtr.37856.1.S1_at		Serine/threonine-protein kinase BIK1 EC=2.7.11.1; AltName: Full=Protein BOTRYTIS-INDUCED KINASE 1;	6.9558	0.718902	0.419595	0.591028	0.700346	0.384552	0.82597	0.843879	0.675597	0.867223	0.704253	0.297194	0.620782	0.511916	0.112685	0.234459	4.59768	0.00157363	0.0285406	9.23721	8.89603	9.66729	9.4113	GO:0006468	protein amino acid phosphorylation	GO:0016301	kinase activity	KOG: Serine/threonine protein kinase
Mtr.9708.1.S1_at		Cysteine-rich receptor-like protein kinase 10 Short=Cysteine-rich RLK10; EC=2.7.11.-; AltName: Full=Receptor-like protein kinase 4; Flags: Precursor;	2.1344	0.511333	0.0114871	0.136117	0.755287	0.247945	0.794797	0.683866	0.124294	0.714446	0.643757	0.0353169	0.309089	0.830305	0.438266	0.464832	4.56011	9.20397e-06	0.000988129	3.88753	3.76553	5.10014	5.04876	GO:0006468	protein amino acid phosphorylation	GO:0016301	kinase activity	KOG: Serine/threonine protein kinase
Mtr.29164.1.S1_at		protein kinase (APK1a)	3.2933	0.598762	0.2183	0.484098	0.670804	0.33312	0.8145	1.15179	0.728357	0.87366	0.842002	0.605602	0.74469	0.476329	0.0827503	0.196877	4.53804	0.00173814	0.0306434	8.89178	8.59954	8.66569	8.64566	GO:0006468	protein amino acid phosphorylation	GO:0016301	kinase activity	KOG: Serine/threonine protein kinase
Mtr.42869.1.S1_at		BRASSINOSTEROID INSENSITIVE 1-associated receptor kinase 1 Short=BRI1-associated receptor kinase 1; EC=2.7.11.1; AltName: Full=Somatic embryogenesis receptor-like kinase 3; Flags: Precursor;	4.7769	1.95238	0.120755	0.396058	0.412313	0.0456309	0.626193	0.473362	0.0857567	0.687391	0.33647	0.00499048	0.124951	0.580357	0.201001	0.320222	4.5219	0.00205185	0.0341803	9.52845	8.82082	8.51294	8.6893	GO:0007165	signal transduction	GO:0005515	protein binding	KOG: FOG: Leucine rich repeat
Mtr.20547.1.S1_at		Putative serine/threonine-protein kinase At1g01540 EC=2.7.11.1;	2.0641	1.3757	0.176489	0.452697	0.572087	0.0251648	0.550114	0.562093	0.0215352	0.541334	0.469368	0.000882051	0.0485804	0.502997	0.00790674	0.0465529	4.49408	6.68544e-06	0.000794026	8.65213	8.15785	6.40939	6.91409	GO:0006468	protein amino acid phosphorylation	GO:0016301	kinase activity	KOG: Serine/threonine protein kinase
Mtr.13314.1.S1_at		Serine/threonine-protein kinase Nek2 EC=2.7.11.1; AltName: Full=NimA-related protein kinase 2; AltName: Full=OsNek2;	6.3705	1.05978	0.885633	0.731213	1.94318	0.114561	0.724735	0.900647	0.795613	0.8803	1.45226	0.267353	0.603031	0.122797	8.61537e-05	0.00226796	4.39067	0.00196434	0.0331725	10.8142	10.2603	9.91916	9.96159	GO:0006468	protein amino acid phosphorylation	GO:0016301	kinase activity	KOG: Serine/threonine protein kinase
Mtr.17495.1.S1_s_at		mitogen-activated protein kinase, putative / MAPK, putative (MPK10)	4.0252	0.737463	0.548297	0.639382	1.18986	0.73079	0.886212	0.802467	0.663528	0.865836	0.969653	0.940338	0.813287	0.330207	0.0408381	0.13078	4.30079	0.00995527	0.0965598	10.4553	10.4976	10.2848	10.4216	GO:0006979 GO:0007165 GO:0006950 GO:0009738 GO:0010374 GO:0010375	response to oxidative stress	GO:0004707 GO:0016301 GO:0004672	MAP kinase activity	KOG: Mitogen-activated protein kinase
Mtr.49353.1.S1_at		Casein kinase I homolog 2 EC=2.7.11.1;	4.1465	0.521565	0.166376	0.444308	0.88361	0.786055	0.893017	0.648567	0.348753	0.814101	0.689939	0.325973	0.637099	0.7796	0.586361	0.52794	4.29145	0.00524756	0.0645295	8.81602	8.75322	9.36304	9.09461	GO:0006468	protein amino acid phosphorylation	GO:0016301	kinase activity	KOG: Casein kinase (serine/threonine/tyrosine protein kinase)
Mtr.39468.1.S1_at		BRASSINOSTEROID INSENSITIVE 1-associated receptor kinase 1 Short=BRI1-associated receptor kinase 1; EC=2.7.11.1; AltName: Full=Somatic embryogenesis receptor-like kinase 3; Flags: Precursor;	2.4043	0.745322	0.259841	0.512586	0.772738	0.320679	0.811604	0.640392	0.0959236	0.697951	0.625632	0.036859	0.314981	0.636944	0.0923131	0.209931	4.25673	3.44483e-05	0.00237993	6.65821	6.56834	5.97728	6.01123	GO:0016049 GO:0009742	cell growth	GO:0005515 GO:0004674 GO:0046982	protein binding	KOG: Serine/threonine protein kinase
Mtr.30764.1.S1_at		Probable receptor-like protein kinase At3g46290 EC=2.7.11.-; Flags: Precursor;	2.3193	0.845927	0.637159	0.668193	0.639108	0.217029	0.779372	0.570716	0.127154	0.716366	0.5105	0.03143	0.294998	0.806308	0.544898	0.511918	4.0195	0.00111586	0.0228153	9.22448	8.30424	8.24793	8.21723	GO:0006468	protein amino acid phosphorylation	GO:0016301	kinase activity	KOG: Serine/threonine protein kinase
Mtr.18414.1.S1_at		Probable inactive receptor kinase At3g08680 Flags: Precursor;	2.6398	0.652767	0.0862608	0.350329	0.536888	0.017133	0.517409	0.710998	0.162856	0.745875	0.526221	0.0040261	0.11295	1.04098	0.865214	0.618813	3.85522	3.23316e-05	0.00226228	10.2109	8.68159	6.31832	6.83542	GO:0006468 GO:0007169	protein amino acid phosphorylation	GO:0005524 GO:0016301 GO:0004674	ATP binding	KOG: Serine/threonine protein kinase
Mtr.1886.1.S1_at		hypothetical protein predicted by Glimmer/Critica	3.2035	0.918969	0.812069	0.713497	0.864408	0.68239	0.880579	0.801722	0.536323	0.846057	0.783121	0.404614	0.675145	0.408374	0.0213563	0.0887976	3.84502	0.00150647	0.0277707	10.0943	9.14338	8.3147	8.65642	GO:0006468	protein amino acid phosphorylation	GO:0016301	kinase activity
Mtr.13789.1.S1_at		Receptor-like protein kinase 2 EC=2.7.11.1; Flags: Precursor;	2.8329	0.721352	0.231491	0.493837	0.575609	0.052006	0.642638	0.628756	0.0966211	0.69841	0.507855	0.00626931	0.138957	1.01813	0.94623	0.639687	3.76217	0.000134168	0.00576206	4.3147	4.07039	3.71149	3.96347	GO:0006468 GO:0007169	protein amino acid phosphorylation	GO:0005524 GO:0016301 GO:0004674	ATP binding	KOG: Serine/threonine protein kinase
Mtr.34709.1.S1_at		Protein STRUBBELIG-RECEPTOR FAMILY 7 AltName: Full=Leucine-rich repeat receptor kinase-like protein SRF7; Flags: Precursor;	3.2533	0.587094	0.0192441	0.178837	0.856549	0.458507	0.842735	0.57193	0.0148526	0.497688	0.621437	0.0117011	0.187179	0.941242	0.770148	0.591957	3.694	1.05322e-05	0.00105808	3.97269	4.41278	6.61324	6.20945	GO:0006468	protein amino acid phosphorylation	GO:0016301	kinase activity	KOG: Serine/threonine protein kinase
Mtr.8700.1.S1_at		CBL-interacting serine/threonine-protein kinase 11 EC=2.7.11.1; AltName: Full=SOS2-like protein kinase PKS5; AltName: Full=SNF1-related kinase 3.22; AltName: Full=SOS3-interacting protein 4;	9.0598	0.884635	0.580581	0.650405	0.95424	0.832058	0.898037	0.611625	0.0385014	0.603735	0.698385	0.0607042	0.382974	0.548982	0.0143342	0.0691253	3.52805	3.19935e-05	0.00224788	11.5375	10.7627	10.9236	10.9423	GO:0006468 GO:0007165	protein amino acid phosphorylation	GO:0016301	kinase activity	KOG: Serine/threonine protein kinase
Mtr.25889.1.S1_at		Nodulation receptor kinase EC=2.7.11.1; Flags: Precursor;	2.036	0.766078	0.355557	0.563846	0.708701	0.236904	0.788968	0.66331	0.16245	0.745749	0.604579	0.0432766	0.334822	0.791779	0.416724	0.45464	3.50706	0.000415384	0.0119419	7.82464	8.99379	8.47452	8.72622	GO:0006468	protein amino acid phosphorylation	GO:0016301	kinase activity	KOG: Serine/threonine protein kinase
Mtr.12771.1.S1_at		Serine/threonine-protein kinase PBS1 EC=2.7.11.1; AltName: Full=AvrPphB susceptible protein 1;	4.2456	0.584712	0.165698	0.443641	0.74107	0.428771	0.836905	1.16396	0.686157	0.867442	0.906148	0.747794	0.778058	0.569595	0.147237	0.27104	3.48091	0.00399833	0.0541211	10.5008	10.0183	9.52709	9.71339	GO:0006499 GO:0006468	N-terminal protein myristoylation	GO:0016301	kinase activity	KOG: Serine/threonine protein kinase
Mtr.51425.1.S1_at		Cysteine-rich receptor-like protein kinase 3 Short=Cysteine-rich RLK3; EC=2.7.11.-; Flags: Precursor;	1.9442	0.674186	0.0689838	0.322269	0.698478	0.0948849	0.700937	0.616279	0.0294533	0.572215	0.570103	0.00374929	0.107929	1.02591	0.900659	0.628334	3.35877	2.19344e-05	0.00175696	7.80993	7.80735	7.58421	7.41024	GO:0006468	protein amino acid phosphorylation	GO:0016301	kinase activity	KOG: Serine/threonine protein kinase
Mtr.12415.1.S1_at		CBL-interacting protein kinase 9 (CIPK9)	9.0771	0.906892	0.685486	0.680673	0.776742	0.302475	0.806413	0.965527	0.884143	0.889617	0.825457	0.336502	0.643057	0.450577	0.00413407	0.0306564	3.26313	0.000150722	0.00623866	10.4376	10.0704	10.2313	9.86341	GO:0010107	potassium ion import	GO:0016301	kinase activity	KOG: Serine/threonine protein kinase
Mtr.20947.1.S1_x_at		Putative cysteine-rich receptor-like protein kinase 39 Short=Cysteine-rich RLK39; EC=2.7.11.-; Flags: Precursor;	2.1791	0.689565	0.363865	0.568131	0.852766	0.693944	0.881752	0.805011	0.592848	0.855947	0.778194	0.451096	0.693959	0.657772	0.307913	0.395277	3.21157	0.0100149	0.096929	4.80219	5.34341	3.01792	3.45943	GO:0006468	protein amino acid phosphorylation	GO:0016301	kinase activity	KOG: Serine/threonine protein kinase
Mtr.9192.1.S1_at		Receptor-like protein kinase 2 EC=2.7.11.1; Flags: Precursor;	2.1993	1.49083	0.215417	0.481802	0.40788	0.0107708	0.46684	0.925441	0.805335	0.881356	0.522301	0.0209041	0.246909	0.57911	0.0970174	0.215721	3.06853	0.00240721	0.0381391	8.3345	8.66	7.73268	7.94486	GO:0007165	signal transduction	GO:0005515	protein binding	KOG: FOG: Leucine rich repeat
Mtr.22308.1.S1_at		Protein kinase G11A EC=2.7.11.1;	2.6652	0.938938	0.846154	0.72095	0.573999	0.102151	0.712593	0.601458	0.131739	0.721437	0.492128	0.0156023	0.214281	1.04778	0.885676	0.624851	2.94426	0.00400697	0.0541977	5.98868	3.52356	5.38198	6.04439	GO:0006468	protein amino acid phosphorylation	GO:0016301	kinase activity	KOG: Putative serine/threonine protein kinase
Mtr.35290.1.S1_at		Probable inactive receptor kinase At5g58300 Flags: Precursor;	2.9054	0.520506	0.0376141	0.247072	0.793395	0.432156	0.837542	0.926018	0.792325	0.88016	0.814216	0.393784	0.669891	0.894567	0.703076	0.570931	2.92315	0.00191415	0.0326734	8.56262	6.85798	4.51096	4.94953	GO:0006468 GO:0007169	protein amino acid phosphorylation	GO:0005524 GO:0016301 GO:0004674	ATP binding	KOG: Serine/threonine protein kinase
Mtr.10923.1.S1_at		BRASSINOSTEROID INSENSITIVE 1-associated receptor kinase 1 Short=BRI1-associated receptor kinase 1; EC=2.7.11.1; AltName: Full=Somatic embryogenesis receptor-like kinase 3; Flags: Precursor;	9.6757	1.14821	0.68753	0.681234	0.659714	0.235907	0.788689	0.752862	0.412748	0.823053	0.627163	0.110351	0.466183	0.604613	0.155908	0.279749	2.90021	0.006366	0.073289	10.613	10.02	9.43858	9.53955	GO:0006468	protein amino acid phosphorylation	GO:0016301	kinase activity	KOG: Serine/threonine protein kinase
Mtr.4615.1.S1_at		Putative cysteine-rich receptor-like protein kinase 43 Short=Cysteine-rich RLK43; EC=2.7.11.-; Flags: Precursor;	1.9572	0.694377	0.0269994	0.211909	0.753039	0.07619	0.676137	0.758007	0.0825549	0.681356	0.688114	0.00764043	0.152451	0.92404	0.603917	0.534243	2.73038	6.04217e-06	0.000749339	4.33628	3.89724	3.81762	4	GO:0006468	protein amino acid phosphorylation	GO:0016301 GO:0030246	kinase activity
Mtr.7900.1.S1_at		Phytosulfokine receptor EC=2.7.11.1; AltName: Full=Phytosulfokine LRR receptor kinase; Flags: Precursor;	2.2736	0.547752	0.0123275	0.141361	0.726403	0.152422	0.750788	0.749229	0.193451	0.763985	0.666594	0.0332029	0.301886	1.22903	0.346343	0.418312	2.72937	0.000254358	0.00881317	4.05311	3.63227	3.15381	3.16993	GO:0007165	signal transduction	GO:0005515	protein binding	KOG: FOG: Leucine rich repeat
Mtr.1927.1.S1_at		Receptor-like protein kinase 5 EC=2.7.11.1; Flags: Precursor;	2.8279	0.660479	0.136401	0.415162	0.790709	0.387271	0.826804	0.809325	0.434969	0.828531	0.742608	0.187035	0.548162	0.892294	0.671846	0.560517	2.65151	0.00209522	0.034685	7.86419	7.72656	6.44294	6.63517	GO:0006468	protein amino acid phosphorylation	GO:0016301	kinase activity	KOG: Serine/threonine protein kinase
Mtr.50288.1.S1_at		Cysteine-rich receptor-like protein kinase 8 Short=Cysteine-rich RLK8; EC=2.7.11.-; Flags: Precursor;	1.9069	0.844987	0.534315	0.634717	0.734087	0.261137	0.799332	0.813156	0.446878	0.830013	0.708948	0.13224	0.493528	0.749265	0.292754	0.386025	2.64602	0.00219566	0.0357995	5.84046	4.84298	4.64386	4.54226	GO:0006468	protein amino acid phosphorylation	GO:0016301	kinase activity	KOG: Serine/threonine protein kinase
Mtr.7950.1.S1_at		Ser/Thr protein kinase-like protein PERK1-like	2.1985	0.795257	0.376425	0.573356	1.06217	0.813625	0.896231	0.882132	0.625069	0.860354	0.95753	0.835394	0.794359	0.527488	0.0222318	0.091081	2.5442	0.0020194	0.0337648	8.01737	7.50938	8.04821	8.17941	GO:0006468	protein amino acid phosphorylation	GO:0004702	receptor signaling protein serine/threonine kinase activity	KOG: Serine/threonine protein kinase
Mtr.20947.1.S1_at		Putative cysteine-rich receptor-like protein kinase 39 Short=Cysteine-rich RLK39; EC=2.7.11.-; Flags: Precursor;	2.008	0.696564	0.240632	0.499736	0.843735	0.574523	0.866491	0.897292	0.719453	0.872274	0.830666	0.454664	0.695325	0.75546	0.358461	0.425491	2.51008	0.00707315	0.0783937	4.71149	5.07039	3.12102	3.39232	GO:0006468	protein amino acid phosphorylation	GO:0016301	kinase activity	KOG: Serine/threonine protein kinase
Mtr.9980.1.S1_at		Mitogen-activated protein kinase kinase 1 Short=MAP kinase kinase 1; EC=2.7.12.2; AltName: Full=NMAPKK; AltName: Full=AtMEK1;	3.6844	1.19665	0.560821	0.643242	0.575728	0.087022	0.691926	0.908658	0.75535	0.876045	0.64925	0.099776	0.454166	0.63924	0.158639	0.28233	2.49892	0.00823459	0.085893	6.87529	6.55919	6.46761	6.67525	GO:0000165 GO:0009628 GO:0009611	MAPKKK cascade	GO:0004708 GO:0016301	MAP kinase kinase activity	KOG: Mitogen-activated protein kinase kinase (MAP2K)
Mtr.13872.1.S1_at		putative S-receptor kinase	2.0794	0.860927	0.589817	0.653497	0.925763	0.780476	0.891759	0.798877	0.421648	0.825231	0.817811	0.379081	0.662617	0.680961	0.177676	0.299493	2.30639	0.00758812	0.0817169	10.0488	9.16289	8.5519	8.80607	GO:0006468	protein amino acid phosphorylation	GO:0004672	protein kinase activity
Mtr.43576.1.S1_at		Serine/threonine-protein kinase fray2 EC=2.7.11.1; AltName: Full=STE20-like kinase fray2;	1.7309	0.645153	0.0231447	0.196111	0.835582	0.317108	0.810933	0.781486	0.175786	0.755308	0.752674	0.0631636	0.387907	1.06895	0.706343	0.572141	2.2206	0.000334829	0.0104262	8.05365	8.29646	8.32148	8.04166	GO:0006468	protein amino acid phosphorylation	GO:0016301	kinase activity	KOG: Ste20-like serine/threonine protein kinase
Mtr.11345.1.S1_at		protein kinase (APK1a)	2.0165	0.991349	0.971006	0.747645	0.785627	0.320876	0.811604	0.841568	0.474378	0.83542	0.758934	0.170989	0.533624	0.694152	0.141028	0.265374	2.19793	0.00429657	0.0567906	5.61471	4.63227	4.10434	3.91648	GO:0006468	protein amino acid phosphorylation	GO:0016301	kinase activity	KOG: Serine/threonine protein kinase
Mtr.41383.1.S1_at		Wall-associated receptor kinase-like 4 EC=2.7.11.-; Flags: Precursor;	1.8385	0.842478	0.369076	0.570384	0.855875	0.413673	0.832662	0.810809	0.274914	0.795838	0.783825	0.127682	0.487719	0.831128	0.333461	0.410544	2.058	0.00138271	0.0263677	8.47086	8.05961	7.48059	7.41024	GO:0006468	protein amino acid phosphorylation	GO:0005524 GO:0004672	ATP binding	KOG: Serine/threonine protein kinase
